1 **Crowdsourcing: Spatial clustering of low-affinity binding sites amplifies *in***  
2 ***vivo* transcription factor occupancy**

3 Justin Malin<sup>1,3\*</sup>, Daphne Ezer<sup>2,3</sup>, Xiaoyan Ma<sup>2</sup>, Steve Mount<sup>1</sup>, Hiren Karathia<sup>1</sup>, Seung Gu  
4 Park<sup>1</sup>, Boris Adryan<sup>2</sup>, Sridhar Hannenhalli<sup>1\*</sup>

5 <sup>1</sup>Center for Bioinformatics and Computational Biology

6 Department of Cell and Molecular Biology

7 University of Maryland, College park, MD

8 <sup>2</sup>Department of Genetics

9 University of Cambridge, Cambridge, UK

10 **<sup>3</sup>These authors contributed equally to the work**

11 **\*Co-corresponding authors**

12 Justin Malin

13 3104E Biomolecular Sciences Building (#296)

14 University of Maryland, College Park, MD 20742, USA

15 301 405 8218 (v) 301 314 1341 (f)

16 [jmalin@umd.edu](mailto:jmalin@umd.edu)

17

18 Sridhar Hannenhalli

19 3104G Biomolecular Sciences Building (#296)

20 University of Maryland, College Park, MD 20742, USA

21 301 405 8219 (v) 301 314 1341 (f)

22 [sridhar@umiacs.umd.edu](mailto:sridhar@umiacs.umd.edu)

23 **Key words:** Transcriptional regulation, epigenomics, enhancer, enhancer cluster,

24 chromatin structure, crowdsourcing, information content, binding affinity, cell-

25 specificity, binding site degeneracy, chromatin hub

26

27

28

29

30

31

32

33

34

35

36

37 **Abstract**

38 To predict *in vivo* occupancy of a transcription factor (TF), current models consider only  
39 the immediate genomic context of a putative binding site (BS) – impact of the site’s  
40 spatial chromatin context is not known. Using clusters of spatially proximal enhancers,  
41 or archipelagos, and DNase footprints to quantify TF occupancy, we report for the first  
42 time an emergent group-level effect on occupancy, whereby BS within an archipelago  
43 experience greater *in vivo* occupancy than comparable BS outside archipelagos, i.e. BS  
44 not in spatial proximity with other homotypic BS. This occupancy boost is tissue-specific  
45 and scales robustly with the total number of BS, or enhancers, for the TF in the  
46 archipelago. Interestingly, enhancers within an archipelago are non-uniformly impacted  
47 by the occupancy boost; specifically, archipelago enhancers that are enriched for BS  
48 corresponding to degenerate motifs exhibit the greatest occupancy boost, as well as the  
49 highest overall accessibility, evolutionary selection, and expression at neighboring gene  
50 loci. Strikingly, archipelago-wide activity scales with expression of TFs with degenerate,  
51 but not specific, motifs. We explain these results through biophysical modelling, which  
52 suggests that spatially proximal homotypic BS facilitate TF diffusion, and induce boosts  
53 in local TF concentration and occupancy. Together, we demonstrate for the first time  
54 cooperativity among genomically distal homotypic BS that is contingent upon their  
55 spatial proximity, consistent with a TF diffusion model. Through leveraging of three-  
56 dimensional chromatin structure and TF availability, weak archipelago binding sites  
57 *crowdsource* their occupancy as well as context specificity, with coordinated switch-like  
58 effect on overall archipelago activity.

59

60

61

## 62 **Introduction**

63 Eukaryotic transcriptional regulation is critically mediated by the binding of specific  
64 transcription factors (TF) to their cognate DNA binding sites in the genome (Spitz and  
65 Furlong 2012). A TF's *in vivo* DNA binding varies dramatically over developmental time  
66 and across tissues (Yáñez-Cuna et al. 2012; Plank and Dean 2014), and as such, a TF's *in*  
67 *vitro* binding preference, or motif, does not accurately predict its *in vivo* binding  
68 (Yáñez-Cuna et al. 2012; Zinzen et al. 2009). Thus, a TF's DNA binding motif suffers  
69 from being, both insufficiently informative to precisely specify binding in the large  
70 genomic substrate and insensitive to the *in vivo* environment, making it essential to  
71 characterize additional determinants of *in vivo* TF-DNA binding (Moses et al. 2004;  
72 Heinz et al. 2013).

73 Spatio-temporal variation in TF binding has been shown to be, in part, mediated by the  
74 local chromatin state of a binding site (BS) (Hesselberth et al. 2009). Recent work  
75 highlights three additional features of functional binding: (1) high GC content (White et  
76 al. 2013), (2) cooperative binding (Smith et al. 2013; Yáñez-Cuna et al. 2012) and (3)  
77 clusters of homotypic clusters of BS for a common TF, or HCTs (Gotea et al. 2010; Ezer  
78 et al. 2014a). These three features have been shown to be enriched in gene promoters  
79 and distal enhancers and to contribute to functional *in vivo* binding leading to  
80 transcriptional activation (Gotea et al. 2010; White et al. 2013; Arvey et al. 2012; Sharon  
81 et al. 2012). Still, most BS predicted by current models are not bound *in vivo* (Arvey et  
82 al. 2012; Slattery et al. 2014; Moses et al. 2004).

83 To date, research on determinants of functional TF binding, such as those above, have  
84 focused on putative BS and immediate flanking sequences. In parallel, the three-  
85 dimensional organization of the genome has emerged as an important mediator of  
86 transcriptional regulation, where spatial, not genomic, proximity is determinative  
87 (Fullwood et al. 2009; Ing-simmons et al. 2014; Babaei et al. 2015; Filippova et al. 2013).  
88 Chromatin looping events have been shown to combine at a higher organizational level,  
89 where they confer spatial proximity to functionally related genes and their distal  
90 regulatory regions (Fullwood et al. 2009; Li et al. 2012; Schwarzer and Spitz 2014;  
91 Fraser 2006; Lieberman-aiden et al. 2009). In vertebrates, for example, Hox genes,  
92 globin genes, and olfactory receptors, along with their distal enhancers, adopt a spatially  
93 clustered conformation, termed as 'regulatory Archipelago' (AP), as a prerequisite for  
94 robust transcriptional activation (Schoenfelder et al. 2010a; Vernimmen 2014;

95 Montavon and Duboule 2012; Schwarzer and Spitz 2014; Markenscoff-Papadimitriou et  
96 al. 2014). Despite mounting evidence supporting functional criticality of chromatin  
97 interactions in context-specific transcriptional regulation, the potential impact of spatial  
98 clustering of BS on their individual TF occupancy has not been investigated. Recent  
99 findings that spatially clustered enhancers (we borrow the term ‘archipelago’ to refer to  
100 such spatially clustered enhancers) often share BS for the same TF, i.e., homotypic sites  
101 (Taher et al., 2013; Malin et al., 2013) make such enquiry even more compelling. Given  
102 the impact on functional binding of genomic homotypic clusters of BS (He et al. 2012b;  
103 Ezer et al. 2014a), we investigated the impact of *spatial* homotypic clusters of BS – that  
104 is, spatially clustered but genomically distant BS for a mutual TF.

105 In what follows, it's crucial to distinguish binding affinity of a TF for a BS, which is  
106 typically assessed *in vitro*, from TF occupancy at a BS, which is an *in vivo* state and  
107 depends on additional factors – most directly, TF concentration (Foat et al. 2006).  
108 Importantly, TF concentration and, hence, TF occupancy, may be non-uniformly  
109 spatially distributed in the nucleus (Schoenfelder et al. 2010a; Chakalova and Fraser  
110 2010). Indeed, as described by facilitated TF diffusion, BS for a common TF in a HCT act  
111 together to briefly 'trap' a TF into diffusing back and forth amongst themselves along the  
112 chromatin (Brackley et al. 2012; Ezer et al. 2014a, 2014b), resulting in higher-than-  
113 expected occupancy in the HCT.

114 Here, based on clusters of spatially proximal enhancers, or APs (Malin et al 2013,  
115 Sheffield et al 2013), and using nucleotide-resolution DNase footprints to quantify  
116 context-specific *in vivo* TF occupancy data (Neph et al. 2012), we demonstrate a strong  
117 group-level effect on TF occupancy whereby individual BS within an AP experience  
118 greater *in vivo* occupancy than their counterparts outside APs, i.e., enhancers that are  
119 not in spatial proximity with other enhancers. We refer to the differential occupancy as  
120 ‘*occupancy boost*’. Strikingly, occupancy boost for a TF in an AP scales robustly with  
121 both the number of putative BS per AP enhancer, i.e., homotypicity, as well as the  
122 number of accessible enhancers in the AP. TFs with degenerate motifs, which are  
123 expected to have abundant putative BS, are consistently among the TFs subject to the  
124 greatest occupancy boosts; in large APs, mean boosts for homotypic BS corresponding to  
125 highly degenerate motifs are between 2 and 3-fold. Based on these results, we propose  
126 that *in vivo* occupancy at particular BS in an AP is amplified by the presence of  
127 homotypic BS in spatial proximity, i.e., BS ‘*crowdsource*’ their own occupancy boost  
128 along with other homotypic BS in their spatial proximity. We extend the aforementioned

129 biophysical model of facilitated diffusion of TFs within one HCT to show that the  
130 observed occupancy boost can result from TFs briefly ‘trapped’, or diffusing, among  
131 multiple spatially proximal HCTs. Among AP enhancers, we find that specifically those  
132 enriched in degenerate motifs (‘enriched enhancers’) are most affected when compared  
133 with AP enhancer depleted for degenerate motifs and comparable non-AP enhancers;  
134 they exhibit several-fold greater boost in activity, their neighboring genes exhibit several-  
135 fold greater expression and, consistent with functional significance, they exhibit a greater  
136 evolutionary conservation. Tellingly, mean AP-wide chromatin accessibility scales with  
137 the expression of cognate TFs with degenerate – but, not specific – motifs. Combined  
138 with other results, this points to a role for crowdsourcing in: (i) initiating a positive  
139 feedback loop whereby greater TF occupancy at enriched enhancer BS increases the  
140 overall accessibility at these enhancers, thus facilitating further occupancy; (ii) endowing  
141 enriched enhancers with switch-like behavior, activating them in specifically those  
142 tissues where chromatin structure and TF availability together result in sufficient  
143 occupancy boost

144

145

## 146 **Results**

### 147 **Analysis overview**

148 Our analysis is based on previously identified enhancer clusters (Malin et al. 2013)  
149 comprising ~1600 enhancers in 40 clusters. Enhancers were clustered based on  
150 correlated DNase hypersensitivity (DHS) profiles across 37 cell lines (representing 82  
151 cell lines). Enhancers in the same cluster were shown to (i) have functionally related  
152 gene neighbors with correlated expression, indicative of coordinated regulation, (ii)  
153 share BS for several TFs, and (iii) be spatially proximal to one another. We will refer to  
154 such enhancer clusters as 'archipelagos' (APs) borrowing from (Spitz and Furlong 2012).  
155 We refined the APs identified in (Malin et al. 2013) to ensure tight spatial proximity  
156 among AP enhancers (see Methods). Note that properties (ii) and (iii) above together  
157 imply a higher spatial density of homotypic BS within an AP, particularly for TFs with  
158 abundant putative BS (Fig. 1A); this generally corresponds to TFs with degenerate  
159 motifs.

160 Previous study suggests that genomic clustering of homotypic BS can boost the cognate  
161 TF's occupancy at individual BS in the cluster (Brackley et al., 2012; Ezer et al., 2014b).  
162 By extending the notion of genomic clusters of homotypic BS to *spatial* clusters of  
163 homotypic BS, here we hypothesize that analogously, mediated by conformational  
164 changes in chromatin organization, such spatial BS cluster may boost binding occupancy  
165 for a cognate TF at individual BS, with potential downstream functional impacts. To test  
166 this hypothesis, we **(i)** contrasted *in vivo* TF binding occupancy in AP enhancers to that  
167 in a stringently controlled set of '*non-AP*' enhancers in the same tissue, **(ii)** assessed  
168 functional impact of occupancy boost at AP enhancers – particularly those enriched for  
169 degenerate motif sites – and their putative gene targets, **(iii)** characterized context-  
170 specificity of the occupancy boost, and **(iv)** tested context-specific TF availability as an  
171 upstream driver of the occupancy boost.

172 In the following analyses, *in vivo* occupancy was estimated for each putative BS using,  
173 alternatively, high-resolution curated cell type-specific DNase footprint data (Neph et al.  
174 2012) or ChIP-Seq ([www.encodeproject.org/ENCODE](http://www.encodeproject.org/ENCODE)) (see Methods). For additional  
175 validation, key tests were repeated using an alternative set of previously published APs  
176 (Sheffield et al. 2013). *In vivo* occupancy of a TF and other functional analyses were  
177 primarily performed in each AP's most active cell line out of 34 examined– its so-called  
178 'AP-active' tissue (see Methods), which offered 730K BS for analysis and 1.8m more in

179 the alternative AP dataset. Results in the AP-active tissue were then contrasted with  
180 those in 'AP-inactive' cell lines. With respect to background for BS-level analyses, for a  
181 given TF, each AP enhancer was matched to a non-AP enhancer controlling for  
182 chromatin accessibility and the number and type of putative BS (Methods).

### 183 **Occupancy boost at AP BS increases with homotypic BS density within AP,** 184 **supporting crowdsourcing of *in vivo* TF occupancy**

185 A putative BS for a TF is deemed bound *in vivo* by the TF if the BS overlaps DNase  
186 footprint based on stringent criteria (Fig. 1B and Methods). For a collection of homotypic  
187 BS, occupancy is quantified as the proportion that are bound *in vivo*. We first found that  
188 the *in vivo* occupancy across all BS in all APs in their respective AP-active cell lines  
189 (Methods) is significantly higher than the occupancy across matched non-AP enhancers  
190 (Wilcoxon test p-value = 2.5E-7), albeit with modest effect size (odds ratio of occupancies  
191 = 1.21). However, according to our central hypothesis we expect AP occupancy to be  
192 pronounced primarily for the subset of TFs with large numbers of BS in spatial proximity  
193 in an AP (Fig. 1A). We therefore examined such TFs explicitly.

194 For a given TF in one AP, we calculated the TF's *coverage* as the total number of cognate  
195 BS in the AP, and calculated its *occupancy boost* as the ratio of occupancy at these BS to  
196 the occupancy at a matched set of non-AP enhancer BS (Methods). Such TF-AP pairs are  
197 the fundamental unit at which the crowdsourcing hypothesis predicts occupancy will be  
198 impacted. Because background levels of BS occupancy in the genome are generally low  
199 (3-4%), the occupancy is zero in both AP and control non-AP enhancer sets for a  
200 majority (65%) of the 25K TF-AP pairs; these pairs were excluded for this analysis. Of  
201 the remaining TF-AP pairs, 3.6k have non-zero occupancy in both AP and non-AP,  
202 encompassing ~95K enhancer-TF pairs and ~205K BS (we call this the *reciprocal* set),  
203 and additional 5k TF-AP have non-zero occupancy in either AP or in matched non-AP BS  
204 (*non-reciprocal* set). We analyze the two sets of TF-AP pairs separately.

205 We stratified the reciprocally occupied TF-APs into 8 bins with exponentially increasing  
206 coverage cutoffs and calculated the overall occupancy boost for each bin as the mean  
207 occupancy boost among member TF-APs. A 95% confidence interval for each bin's mean  
208 was estimated using a bootstrap. As shown in Fig. 2A, the occupancy boost robustly  
209 increases with the TF coverage in the AP. Specifically, we found a substantial difference  
210 in occupancy boost between TF-APs with the highest and lowest 50% coverage (mean of  
211 77.7 % versus 2.1 %; Wilcoxon p-value = 1.4e-5). This trend also holds when coverage

212 was alternatively quantified as the number of enhancers in an AP with at least one BS for  
213 the TF (Fig. 2B), suggesting that the boost is not due to disproportionate contribution  
214 from a few enhancers, but instead relies on widely dispersed BS across the AP's  
215 enhancers. Interestingly, the boosts for high coverage TF-APs increase when the digital  
216 footprint binding criterion for assessing occupancy is made more stringent  
217 (Supplemental Fig. S1A).

218 Abundance of a TF's cognate BS is strongly correlated with its motif degeneracy, as  
219 quantified by the motif's relative entropy (RE) (Fig. 2C) – low RE is identified with high  
220 degeneracy (Hannenhalli 2008). Given this association, we also directly assessed the  
221 relationship between TF motif RE and occupancy and found very similar trends  
222 (Supplemental Fig. S1B). Interestingly, the steepest declines in occupancy boost and in  
223 the distribution of TF RE echo one another, as shown, in that both occur at RE = 7.  
224 When, in an independent set of 11 tissues, we instead used ChIP-Seq to infer occupancy  
225 the trend, again, remained very similar (Supplemental Fig. S1C). Taken together, the  
226 above analyses strongly suggest that binding sites for high coverage TFs experience a  
227 substantial occupancy boost in AP enhancers relative to BS in comparable non-AP  
228 enhancers.

229 The overall TF coverage is affected by both the mean number of BS per AP enhancer  
230 ('homotypicity') and the number of enhancers per AP ('AP size'). Next, we assessed the  
231 relative contributions of these two constituents of coverage on the occupancy boost. As  
232 shown in Fig. 2D, for the reciprocal set, AP size and homotypicity independently and  
233 robustly impact the magnitude of occupancy boost (p-value =  $4.2e-6$ ). A similar analysis  
234 on 5K non-reciprocal TF-AP pairs shows a similar and significant trend (Supplemental  
235 Fig. S1D; p-value  $8.1E-5$ ). Our overall conclusion does not change when we used an  
236 independent set of 450 AP enhancer clusters reported in (Sheffield et al. 2013) based on  
237 1.8 million BS (supplementary Note 1) (Figs. S2A, S2B). Consistent with the expected  
238 importance of spatial proximity, as the Hi-C based screen for pairwise distance between  
239 fellow AP member enhancers became more stringent, the trend improved  
240 (Supplementary Note 1).

241 The observed link between spatial BS abundance and occupancy, we reasoned, may  
242 partly be mediated by cooperativity among the bound TFs within an AP (Martinez and  
243 Rao 2012). However, as explained in supplementary Note 2, we found that even though  
244 heterodimerizing TFs exhibit a somewhat (but significantly) larger boost than other TFs,



245 this difference can largely be explained by their greater BS coverage (Supplemental Fig.  
246 S3. Taken together, these results strongly suggest that AP TF's occupancy at a specific BS  
247 in an AP is 'crowdsourced' by the collective of its putative BS in the AP.

### 248 **TF occupancy boost in spatial clusters of BS is consistent with a facilitated-** 249 **diffusion model**

250 Previous studies have shown that a facilitated diffusion model can explain the greater occupancy  
251 in homotypic clusters of BS (Brackley et al. 2012). Here we simulated an extended version of the  
252 biophysical model for HCTs in isolation to determine whether the crowdsourcing effect is  
253 sufficient to explain the observed AP-mediated occupancy boost. All details pertaining to the  
254 model, algorithms, and results are provided in Supplemental File 'Facilitated\_Diffusion\_Model'.  
255 First, in a simple scenario, we investigated specifically how occupancy is affected by (i) the  
256 spatial distance between enhancers within an AP cluster, (ii) the genomic distance between  
257 binding sites within an AP enhancer, and (iii) the number of binding sites within each enhancer.  
258 Then, we investigated various 3D organizations of homotypic binding sites that would closely  
259 represent the crowding of low-RE binding sites in AP clusters *in vivo*. Our simulation results  
260 suggest that both the presence of homotypic clusters and inter-strand jumping between  
261 enhancers within an AP can increase the average TF occupancy. For instance, in the case of four  
262 enhancers containing pairs of homotypic binding sites, as shown in Fig. 3B, there was a 60% to  
263 170% increase in TF occupancy when the enhancers were part of AP clusters (in which  
264 enhancers are 100nm to 200nm apart, as compared to being 10000 nm apart, by default), and  
265 in the case of eight enhancers containing pairs of homotypic binding sites there was an 118% to  
266 277% increase occupancy (Fig. 3D), which suggests that the crowdsourcing effect is a  
267 biophysically sound strategy for increasing local TF occupancy in APs at a biologically  
268 meaningful scale.

### 269 **AP enhancers that are enriched for degenerate motifs have greater occupancy** 270 **boost and higher downstream functional impact**

271 Previous studies have shown a trend for AP enhancers to share homotypic BS (Malin et  
272 al 2013, Sheffield et al 2013). We reasoned that this could result if AP enhancers were  
273 enriched for degenerate, i.e., motifs with low RE, which are expected to be generally  
274 abundant, thus increasing the chance of being shared among AP enhancers. We found  
275 this to be true (Fig. 4D). Furthermore, our empirical results above and the biophysical  
276 model suggest that homotypicity within an enhancer as well as spatial clustering of such  
277 enhancers can increase TF occupancy at biologically meaningful scales. Together, these

278 led us to hypothesize that the particular AP enhancers that are enriched for low-RE  
279 (degenerate) motif BS may be especially affected by crowdsourcing. In the following  
280 analyses, we employ multiple thresholds for RE to define ‘low’ RE motifs.

281 Activity of an enhancer, and ultimately, activation of its target gene, is associated with  
282 the amount of TF binding in the enhancer (Smith et al. 2013; Fisher et al. 2012). Hence,  
283 given the occupancy boost at low-RE TF sites in AP enhancers, we hypothesized that the  
284 enhancers that are enriched for low-RE TF sites will have the largest overall increase in  
285 activity, and by proxy, increase in expression of their putative target genes. For each AP  
286 enhancer, assuming its closest gene neighbor to be its putative target (Djebali et al.  
287 2012), we calculated its ‘expression boost’, similar to occupancy boost above, as the  
288 relative change in expression of the gene relative to the target gene of the control non-AP  
289 enhancer (Methods). We then compared expression boost for AP enhancers enriched for  
290 low-RE motif BS (*enriched* enhancers) to that for AP enhancers depleted in low-RE sites  
291 (*depleted* enhancers) (Methods). As shown in Fig. 4, the putative target genes of  
292 enriched enhancers have much greater expression in AP-active tissues than their non-AP  
293 counterparts, while the depleted enhancers do not. Moreover, as the degree of  
294 enrichment increases from top 50% to top 10%, the relative expression boost increases  
295 from 62% to 196% (for low-RE cutoff of 5); The difference in AP and non-AP neighbor  
296 gene expression for depleted enhancers is nearly as stark – but in the opposite direction:  
297 as the degree of enrichment increases from top 50% to top 10%, the drop in AP  
298 expression relative to non-AP grows from -32% to -72% (i.e., non-AP expression is 3.5-  
299 fold higher). GC content differences cannot explain either trend, as GC content in non-  
300 AP enriched (depleted) enhancers is <10% (15%) higher than in corresponding AP  
301 enhancers. Also, notably, the highest expression boost (Figure 4A, row4) and the highest  
302 occupancy boost (Fig. S1B) occur at similar low-RE cutoffs, thus strengthening the link  
303 between the two; at higher low-RE cutoff (being more permissive) the observed effect  
304 weakens and eventually disappears.

305 As a complementary test (Supplementary Note 3), we compared TF binding patterns  
306 between enhancers within 50Kb of highly expressed genes and enhancers within 50kb of  
307 lowly expressed genes. Consistent with above, we found that the low-RE motif usage  
308 (defined as the fraction of bound BS that are low-RE) was 1.8 to 3.0 times higher in AP  
309 enhancers near highly expressed genes than in those near lowly expressed genes. As a  
310 negative control, we did not observe this pattern for matched non-AP enhancers. Taken  
311 together, these results suggest that low-RE binding specifically at enriched AP enhancers

312 have a significant impact on downstream gene expression. As an additional  
313 ascertainment of the functional importance of enriched AP enhancers, we found such  
314 enhancers to be up to 120% (90%) more evolutionarily conserved at RE cutoff of 5 (4)  
315 (using 20 species PhastCons score (Siepel et al. 2005)) than matched non-AP enhancers;  
316 indeed, the greater their enrichment, the greater the evolutionary constraint we observed  
317 (Fig. 4A, row 3). Depleted AP enhancers, by contrast, were at most 40% more conserved  
318 than their non-AP counterparts.

319 TF binding and chromatin accessibility are intimately connected; higher accessibility  
320 typically leads to higher occupancy, while TF binding can help displace a nucleosome  
321 and increase accessibility (Teif and Rippe 2012). Therefore, we assessed whether  
322 enriched enhancers exhibit a greater boost (relative to matched non-AP enhancers) in  
323 overall accessibility compared with depleted enhancers. For this analysis, we normalized  
324 AP enhancer accessibility by that of non-AP enhancers matched one-to-one with AP  
325 enhancers for numbers of low and not-low RE BS, as described previously, except DHS  
326 was explicitly left uncontrolled. As shown in Fig. 4A (row 2) and Fig. 4B, at RE threshold  
327 of 5, the most enriched enhancers exhibit ~10-fold greater DHS boost (with respect to  
328 matched non-AP enhancers) than do depleted enhancers; as expected, the trend weakens  
329 for higher RE thresholds. To further resolve the effect of BS RE on enhancer  
330 accessibility, we tracked changes in accessibility as we increased the number of low-RE  
331 (high-RE) sites, while holding relatively constant the number of high-RE (low-RE) sites.  
332 As shown in Supplemental Fig. S4, increasing the number of low-RE BS (for relatively  
333 constant high-RE BS count) has a substantial positive impact on enhancer's accessibility  
334 – especially when the number of high-RE BS is low – while increasing the number of  
335 high-RE BS (for a relatively constant low-RE BS count) has an insignificant or negative  
336 impact. In addition, we found that histone acetylation levels (H3K27Ac), which are  
337 associated with active enhancers, had a ratio between enriched and depleted AP  
338 enhancers 3-fold higher than the same ratio in non-AP enhancers (Fig. 4E).

339 Finally, we observed occupancy boosts in enriched enhancers that, unexpectedly, were  
340 up to two-fold higher than in depleted enhancers, often in the same AP and for the same  
341 levels of coverage (220% vs. 110% at low-RE cutoff of 4 (not shown); 93% vs 39% in  
342 alternative APs (Sheffield et al 2013) (Supplementary Note 4; Fig. 4C, Supplemental Fig.  
343 S2C). To account for these unexpectedly high boosts, we address the potential for higher-  
344 order interactions in enriched enhancers among BS for distinct TFs with degenerate  
345 motifs (see Discussion)

346 These results – the relatively higher occupancy boosts, chromatin accessibility,  
347 downstream gene expression, and evolutionary constraint in enriched enhancers, along  
348 with greater prevalence of enriched enhancers among AP than non-AP enhancers –  
349 strongly suggest a hitherto unreported special functional relevance of AP enhancers that  
350 are enriched for low-RE binding sites.

### 351 **Cell type-specificity of AP enhancer occupancy boost and activity**

352 Given the link between occupancy boost and spatial clustering of BS, and given the  
353 context-specificity of spatial proximity (Ay et al. 2014), we expect the occupancy boost to  
354 exhibit cell type specificity. In addition to identifying the cell type where an AP is deemed  
355 active (as employed in analyses thus far), we also identified the cell types where an AP is  
356 deemed inactive, namely those where less than 40% of the AP enhancers were DNase I  
357 hypersensitive. To offset the paucity of bound sites in inactive tissues, all qualifying  
358 inactive tissues for each AP were pooled. We found that for the TF-AP pairs in the  
359 highest coverage bin, occupancy boost dropped from ~112% in its AP-active cell type  
360 down to 38% in inactive cell types (Fig. 5A). In addition, we estimated tissue specificity  
361 of each TF as the cross-tissue dynamic range of its occupancy, defined as the ratio of its  
362 occupancy in AP-active tissue(s) to that in AP-inactive tissues, calculated over the  
363 identical AP BS. Notably, this provides evidence of the occupancy boost's tight  
364 association with coverage without the need for non-AP occupancy as a baseline  
365 (Methods). After controlling for DHS across coverage bins, we find that the TF-APs with  
366 top 10% coverage display 135% greater occupancy in active relative to inactive tissues,  
367 while in the matched non-AP context it is 38% (Fig. 5B). Even larger differentials  
368 between AP and non-AP contexts were observed for their respective ratios of non-  
369 reciprocal binding in active and inactive tissues (Supplemental Fig. S5A). Interestingly,  
370 we found that high coverage TF-AP pairs for heterodimerizing TFs exhibit substantially  
371 higher specificity than other TFs (225% vs. 140%) (Supplemental Fig. S5B), particularly  
372 TFs in MADS and bZIP domain families, suggesting an augmented level of cooperative  
373 binding in APs. This, we suspect, is due to the relatively binary nature of cooperative  
374 binding: in response to small increments in TF concentrations, heterodimers exhibit  
375 disproportionately large changes in occupancy (Giorgetti et al 2010).

### 376 **AP activity is correlated with availability of TFs, specifically those with degenerate motifs**

378 Our results thus far suggest that crowdsourcing may be intimately connected to the

379 regulation of AP enhancer-gene complexes, as it provides a way for the cell to prime or  
380 induce activity in multiple genomic elements simultaneously, in a specific spatial and  
381 tissue context. As shown above, the boost in overall activity (approximated by DHS) of  
382 an AP enhancer is in fact far higher in AP enhancers enriched for low-RE (high coverage)  
383 BS. However, it is not clear whether the binding of TFs corresponding to the low-RE  
384 motifs increases the overall accessibility at the enriched enhancer, or alternatively, an  
385 already increased accessibility at enriched enhancer (by some unknown mechanism) is  
386 responsible for greater occupancy of particular TFs at those enhancer. In order to resolve  
387 this circularity, we tracked tissue-specific gene expression of TFs in 11 cell types and  
388 studied its relationship with tissue-specific AP enhancer accessibility (Methods). As  
389 shown in Fig. 5C, mean AP enhancer accessibility increases robustly with the expression  
390 of TFs comprising high-coverage (red), but not low-coverage, TF-APs (gray), for which  
391 there was a slight but significant inverse relationship, also noted in an analysis above  
392 (Fig. 2A). No such associations were observed in non-AP enhancer sets controlled for  
393 low- and high-RE BS counts (Fig. 5D). Thus, AP enhancer accessibility and activity is  
394 highly responsive to the levels of high-coverage AP TFs as they vary across tissues.

395 Together, these results strongly suggest that crowdsourced boosts in TF occupancy,  
396 through the context-specific binding of high coverage TFs, may help drive tissue-specific  
397 activation of enhancer networks and their target gene complexes.

## 398 **Discussion**

399 **Summary.** Here, we have shown that a TF's *in vivo* occupancy at a particular cognate BS is  
400 much greater when the BS is in spatial clustered with other homotypic BS (i.e., in an AP) than  
401 when it is not. Strikingly, the size of the occupancy boost robustly scales with the number of BS,  
402 or relatedly, the number of enhancers, in the archipelago (AP), suggesting, for the first time, that  
403 the BS in an AP cooperatively crowdsource their own occupancy. To ensure the robustness of  
404 our conclusions, we used stringent controls and employed multiple (i) sources for AP enhancers  
405 (Malin et al 2013, Sheffield et al 2013), (ii) experimental backgrounds (non-AP enhancers in the  
406 AP-active tissue, the same enhancer in AP-inactive tissues), (iii) occupancy scales (per BS, per  
407 enhancer), and (iv) types of occupancy data (curated digital footprints, ChIP-Seq. These  
408 observations are not adequately explained by current models, however, they closely agree with a  
409 standard biophysical model of facilitated TF diffusion that duly accounts for the augmented  
410 diffusion of TFs among spatially proximal homotypic BS. Effectively, a collective of homotypic  
411 clusters of TF BS (HCTs) cooperatively alter their microenvironment, raising the local

412 concentration of their cognate TF. The accompanying occupancy boost, in turn, contributes to  
413 higher overall enhancer activity and putative target gene expression.

414 **Genomic versus Spatial homotypicity.** Our work synthesizes the regulatory roles of HCTs  
415 (e.g. Crocker et al 2015), and of stable chromatin structures (e.g. Downen et al., 2014), by  
416 showing that it is precisely the interplay of numerous HCTs mediated by chromatin folding that  
417 gives rise to the previously undocumented biophysical effect that we have termed  
418 *crowdsourcing*. Enhancer-enhancer interactions have been reported in the context of HOX and  
419 globin gene regulation as well as in high-throughput ChIA-PET assays, but their functional  
420 nature has remained elusive. A notable exception, spatial clustering of enhancers around an  
421 olfactory receptor gene have been associated with removal of repressive H3K9me3  
422 (Markenscoff-Papadimitriou et al. 2014); it is plausible that crowdsourcing is an upstream  
423 trigger of this change – through a general remodeling of the local chromatin state, or through  
424 increased binding of a TF that mediates chromatin remodeling.

425 **Higher order impact of crowdsourcing.** Unexpectedly, we observed up to two-fold higher  
426 occupancy boost and 10-fold greater normalized chromatin accessibility in AP enhancers  
427 enriched for degenerate motifs ('enriched enhancers') than in depleted enhancers. A likely  
428 explanation is the emergence of an aggregate occupancy effect among an enriched enhancer's  
429 frequent degenerate BS, which serves to remodel the local chromatin state. Under inactive  
430 conditions – that is, in AP-inactive tissues or outside of APs – we found that enriched enhancers  
431 (which inherently tend toward far lower GC content than depleted enhancers) display  
432 substantially higher chromatin accessibility compared to depleted enhancers. This is consistent  
433 with previous work suggesting that nucleosomes favor unbound, low GC-content sequence, yet  
434 are readily displaced by strongly binding pioneer factors, or, as in the case of crowdsourcing, by  
435 an aggregate of distinct TFs (Barozzi et al. 2014; Wasson and Hartemink 2009).

436 In an AP-active tissue, conversely, enriched AP enhancers experience a widespread surge in  
437 binding, thereby displacing the nucleosome and boosting occupancy further, in a positive  
438 feedback loop (Fig. 5E). Taken together, the markedly divergent accessibility inside versus  
439 outside an active AP confer to enriched enhancers switch-like behavior, where their state is  
440 determined by their context: harbored in an AP replete with degenerate homotypic BS, their  
441 accessibility increases – but only in tissues in which the cognate TFs are available. In light of this  
442 highly context-specific activation and the rapid evolutionary gain of BS for degenerate motifs,  
443 we suggest that enriched AP enhancers can evolve adaptively relatively free of consequences  
444 from spurious binding. This is the first work to highlight the special functional significance of AP

445 enhancers enriched for abundant, low-affinity BS. However, further work is needed to confirm  
446 to what extent depleted enhancers, whose neighbor genes are expressed at up to three-fold  
447 *lower* levels than those of similar non-AP enhancers, have a unique, perhaps repressive, role.  
448 Interestingly, genes controlling cell identity in stabilized chromatin structures were found  
449 accompanied by repressed genes that coded for yet other lineage-specifying regulators (Downen  
450 et al 2014).

451 Crowdsourcing integrates well with the two prevailing models of coordinated activation of  
452 spatially co-localized gene complexes (Fig. 5E), while providing a missing piece of the puzzle.  
453 Whether (a) long-range enhancer-gene loops form *de novo* upon (or along with) activation of a  
454 gene cluster (Deng et al. 2012), or (b) the loops are pre-formed and are activated by TF  
455 availability (Ghavi-Helm et al. 2014), the cell requires TFs to functionally bind and activate  
456 elements specifically in a targeted gene cluster. Crowdsourcing of low-affinity BS is well-suited  
457 for such targeting, as it can induce specificity through emergent switch-like binding behavior.  
458 Interestingly, a recent study showed a strong correlation between pathway-level gene activity  
459 and pathway-level spatial proximity across cell types (Karathia, Hannenhalli et al., manuscript  
460 under review), suggesting that chromatin structure is intimately connected with gene complex  
461 activation, consistent with (a), above. Unlike direct enhancer-gene interaction in the standard  
462 model for distal transcriptional regulation, crowdsourcing, interestingly, is not observable at the  
463 level of single enhancer-gene interaction, but instead emerges only at higher levels of chromatin  
464 organization and co-regulated gene modules.

465 **Tissue specificity and cooperative binding.** We found that crowdsourcing is highly tissue-  
466 specific, as high-coverage AP BS exhibit several-fold greater occupancy in AP-active relative to  
467 AP-inactive tissues. Such tissue specificity is consistent with the dependence of crowdsourcing  
468 on chromatin context and TF availability, where differential TF availability likely acts not only  
469 directly but also by influencing higher-order chromatin conformation (Pombo and Dillon 2015).  
470 Crowdsourcing endows the cell with a high degree of fine-grained regulatory control, as  
471 occupancy boost magnitude is shaped by the collective availability of multiple TFs and  
472 conditioned on the chromatin-induced spatial proximity of their cognate sites. Fundamentally,  
473 crowdsourcing provides an alternative mechanism of cooperativity to direct cooperative binding  
474 of heterodimerizing TFs, an established source of tissue-specificity. Indeed, crowdsourcing acts  
475 complementarily to cooperative binding (Supplementary Note 2).

476 **Differential occupancy as a vehicle for specificity.** In contrast to previous work  
477 underscoring the functional importance of weak (low occupancy) binding at non-consensus or

478 inherently weak BS that typical ChIP-Seq processing tends to miss due to stringent cutoffs  
479 (Tanay 2006; Biggin 2011; Essien et al. 2009), crowdsourcing leverages spatial chromatin  
480 context to imbue inherently low-affinity sites with unexpectedly high-occupancy binding.  
481 Unidentified crowdsourcing may therefore underlie previous reports linking particular low-  
482 affinity sites with context-specific regulation (e.g. Ramos and Barolo 2013), or linking individual  
483 HCTs to unusually robust binding, for example in regulatory regions upstream of HOX genes  
484 (Crocker et al., 2015). Indeed, occupancy boosts we observed at spatially clustered HCTs were  
485 computed with respect to nominally ‘isolated’ HCTs. As shown by Crocker et al (2015),  
486 occupancy is more robust where degenerate homotypic sites are located in genomic clusters.  
487 HCTs, however, are highly abundant in the genome (Gotea et al. 2010) as well as, by nature,  
488 spatiotemporally invariant, which raises a well-known conundrum, viz. how a TF discriminates  
489 among a multitude of candidate BS (Stewart and Plotkin 2013; Stewart et al. 2012). In contrast  
490 to the static and relatively low specificity of an individual HCT, a large collective of homotypic  
491 low-affinity sites can attain high specificity and spatiotemporal responsiveness precisely by their  
492 capacity to reconfigure the local TF environment *en masse* – in specific favorable chromatin  
493 contexts. Subject to coordinate regulation, a locus is therefore targeted, not through a fixed,  
494 individual address on the one-dimensional genome, but as a conditional and collective nexus in  
495 the 3-D chromatin topology – a mobile area code to which the motif’s short sequence is  
496 appended.

497 **Potential implications for transcription factories, superenhancers.** An archipelago, as  
498 described here, represents a group of spatially clustered enhancers and their likely target genes,  
499 which are often functionally related (Sheffield et al. 2013; Malin et al. 2013). Meeting this same  
500 general description are subnuclear compartments known as transcription factories (Edelman  
501 and Fraser 2012). Transcription factories have been shown to concentrate resources such as  
502 RNA PolII, core components of transcription, as well as some master TF regulators  
503 (Schoenfelder et al. 2010b). However, it is unclear precisely how distinct factories achieve  
504 specific and differential concentrations of master regulator TFs (Schoenfelder et al. 2010a).  
505 Crowdsourcing offers a possible explanation, and is consistent with a speculated role for  
506 resident sequences (Schoenfelder et al. 2010a). While it is generally assumed that high  
507 concentrations of TFs are critical in recruiting genes and their distal regulatory regions to the  
508 factory, our work suggests alternative causality, as supported by formal biophysical simulations.  
509 Although not confirmed, our characterization of archipelagos suggests their operational overlap  
510 with factories.

511 Intriguingly, there is also ample overlap between the conditions for crowdsourcing and known



512 features of superenhancers – enhancers 100Kb or longer in length comprising numerous  
513 smaller regions, which regulate genes critical to cell identity (Whyte et al. 2013). Recent works  
514 have shown that superenhancers are highly tissue-specific and densely occupied by master  
515 regulator TFs, which often recognize degenerate motifs (Vahedi et al. 2015; Heinz et al. 2015).  
516 Critically, superenhancers also reveal unusually high levels of spatial interaction among their  
517 subunits (Heinz et al. 2015). We thus speculate that crowdsourcing may play a role in  
518 superenhancer function.

## 519 **Methods**

520 **Enhancer clusters ('APs').** In previous work, genomically dispersed clusters of  
521 enhancers with correlated activity across cell lines showed evidence of spatial proximity,  
522 particularly in tissues in which the enhancers were active, where spatial proximity  
523 between two genomic segments was inferred from Hi-C (Malin et al. 2013). Starting with  
524 previously published 40 enhancer clusters, we iteratively filtered out the enhancers from  
525 each cluster whose mean spatial proximity to other enhancers was at least one standard  
526 deviation below the original mean across all enhancers in the cluster. This results in 40  
527 APs with a total of 1480 enhancers (Supplementary File 1) with ~37 per AP, ranging from  
528 6 to 89 enhancers per AP.

529 **Determining *in vivo* occupancy at a BS using digital footprint data.** Putative  
530 BS in each enhancer were identified using TRANSFAC vertebrate motifs (Matys et al.  
531 2006) and motif scanning tool PWM\_SCAN (Levy and Hannenhalli 2002) at 95  
532 percentile score cutoff. We identified *in vivo* TF occupancy by overlapping putative BS  
533 with the high-confidence genome-wide digital DNase hypersensitivity footprints  
534 identified in 38 human cell lines (Neph et al. 2012). Digital footprints are a single-base-  
535 pair resolution readout in which the absence of aligned reads in a particular segment of  
536 open chromatin has been shown to predict binding of a protein (Neph et al. 2012). For a  
537 TF, a particular putative BS was considered bound by the cognate TF if there was specific  
538 overlap between the BS and a footprint, with further requirement that (i) the midpoint of  
539 a footprint must overlap the BS; (ii) the midpoint of the BS must overlap the footprint;  
540 and (iii)  $BS\ length + 1 > footprint\ length > BS\ length - 4$ . The latter criteria excludes  
541 otherwise significant footprints that are either too short or too long to confidently be  
542 associated with a given motif instance. When a footprint strongly overlaps sites for  
543 multiple TFs, it was included in the analysis for all such TFs. These highly stringent  
544 criteria were applied equally to AP and to non-AP data.

545 **AP-active and AP-inactive cell lines.** For each AP, we identified the cell line in  
546 which it was most active. Cell lines deemed active for a given AP are those in which at  
547 least 80% of the AP's enhancers are in open chromatin regions, based on overlap with  
548 DHS narrow peaks. In case of more than one such tissue, except where noted, we  
549 selected the tissue with the highest percentage of open enhancers (see Fig. 1A), depicting  
550 workflow. Approximately 95 percent of AP enhancers were found to be accessible in an  
551 AP's 'most active tissue', which for the 40 APs, span 15 distinct cell types out of 34 tested.

552 **Establishing non-AP control.** To establish a non-AP control, for each combination of  
553 TF and AP enhancer we identified a non-AP enhancer (sampled with replacement) with  
554 an identical motif profile, *i.e.* the vector containing the number of instances of each motif  
555 mapping to the given TF. This is an important control, as the number of homotypic BS in  
556 an enhancer that are cognate to a given TF impacts occupancy (He et al. 2012a). We note  
557 that AP and non-AP enhancer have very similar distributions of total BS and length.  
558 Additionally, for each TF motif and AP, AP enhancers' mean DHS in the AP's most active  
559 tissue was matched to within 5% in the corresponding non-AP enhancers' mean DHS in  
560 the same tissue. Any TF-AP enhancer pair for which a non-AP could not be found  
561 meeting these tight controls was excluded. This procedure yielded 430K AP and non-AP  
562 TF-enhancer pairs that harbored 730K BS, of which 31K BS had a DNase footprint  
563 suggestive of a binding event.

#### 564 **Determining TF occupancy at enhancer resolution with ChIP-Seq data**

565 We used ENCODE NarrowPeak Chip-Seq data for 11 cell types – AG10803, AoAF, HA-h,  
566 HAEpiC, HCM, HEEpiC, HFF, HIPEpiC, HMF, HMVEC-dBl-Ad, HMVEC-dLy-Neo,  
567 HVMF, NH-A, NHDF-Ad, NHLF – which gave a total of 135 TFs and 294 TF-cell line  
568 pairs. To increase sample size, all AP-active cell types were used for each AP – that is, all  
569 cell types for which 90% of the AP's enhancers were DNase hypersensitive (Using a  
570 cutoff of, alternatively, 80% or 100% did not change the observed trend). Enhancer  
571 occupancy by a given TF was determined based on overlap between a  $\pm$ 50bp window  
572 surrounding the ChIP-Seq peak and one or more putative motif instances detected  
573 within the enhancer. To mitigate concerns over systematic biases stemming from  
574 variability in protocols or labs of origin, we note that all ChIP-Seq data had identical *de*  
575 *facto* weighting for AP and non-AP enhancer-TF pairs, since these were matched by  
576 motif for BS counts.

577

578 **Comparing neighbor gene expression between AP and non-AP enhancers.** As  
579 a proxy for an enhancer's target gene, following convention, we used the gene closest to  
580 the enhancer. As an extra measure of stringency, in case of non-AP enhancer, we  
581 excluded those enhancers that were farther than 50kb from the nearest gene promoter.  
582 We paired each AP enhancer with one of the remaining non-AP enhancers while  
583 controlling for DHS peak height (within 2%) and numbers of both low-RE and high-RE  
584 sites (within 2%), where RE class is based on a (variable) RE threshold. This yielded  
585 ~1200 pairs of AP and matched non-AP enhancers; the exact number varied with the RE  
586 threshold. For gene expression, five cell types were used for which overall AP activity,  
587 calculated as described above, was at or near its maximum as observed in 15 cell types  
588 for which we had digital DNase footprint and RNA-Seq data  
589 ([www.encodeproject.org/ENCODE](http://www.encodeproject.org/ENCODE)). These were HSMM, A549, NHLF, Ag04450,  
590 and Bj.

591 **Estimating TF's RE.** The relative entropy was calculated for each TF motif (i.e.,  
592 position weight matrix) using TRANSFAC (version 2014.3) (Hannenhalli 2008). In  
593 cases where there were multiple motifs associated with a particular TF (coming from  
594 different publications etc.), the motif with the lowest RE was chosen, because it is  
595 expected to numerically dominate the genome-wide BS for the TF, given its higher  
596 degeneracy.

597 **Identifying low-RE enriched and low-RE depleted AP enhancers.** A relative  
598 entropy (RE) cutoff was used to classify each putative BS in an enhancer as either low-  
599 RE or high-RE (complement of low-RE). This cutoff was varied from RE = 4 (classifies  
600 ~2% enhancers as low-RE) to RE = 9 (classifies > 50% enhancers as low-RE). For each  
601 AP enhancer, after tallying the number of low-RE and high-RE sites, an enrichment p-  
602 value was generated by applying a Fisher Exact test comparing the numbers of low/high  
603 RE sites in the enhancer to those in the pooled set of control (non-AP) enhancers. Based  
604 on this enrichment p-value, enhancers were sorted, and the top and bottom ranked x% of  
605 enhancers compared in subsequent analysis (x in {10, 20, 50}).

606 **Calculating a normalized conservation score.** To compare evolutionary  
607 conservation of low-RE BS enriched AP enhancers to low-RE depleted AP enhancers, we  
608 used PhastCons scores, based on 20 mammalian species (Siepel et al. 2005), which are  
609 resolved to the individual base. Mean scores across the two classes of enhancers were  
610 normalized with respect to non-AP enhancers matched one-to-one with an AP enhancer

611 having approximately the same number of low-RE and high-RE BS, based on a variable  
612 RE cutoff, Additionally, we ensured that non-AP enhancers were within 50Kb of the  
613 promoter of a highly expressed gene, i.e. its fpkm > 1.0 – which, depending on the cell  
614 type, includes approximately the ten percent most highly expressed genes.

615 **Determining occupancy boost with alternative set of AP enhancers.** We  
616 obtained sets of correlated regions generated in (Sheffield et al 2013). Each Sheffield  
617 cluster of DNase hypersensitive (HS) regions initially spanned multiple chromosomes.  
618 To make them consistent with enhancer clusters from Malin et al (2013), regions from a  
619 single Sheffield cluster located on distinct chromosomes were treated as distinct clusters,  
620 and we retained at most the two largest such clusters from each Sheffield cluster.

621 Consistent with previous procedures, we derived enhancer clusters from each Sheffield  
622 cluster by only retaining the regions that overlapped a putative enhancer represented by  
623 a large pooled set of 98,000 P300 ChIP-Seq peaks used previously (Malin et al 2013).

624 To further cull the thousands of resulting enhancer clusters, we excluded those with < 10  
625 enhancers or with mean enhancer DHS < 100 in their most active tissue. We further  
626 excluded Sheffield clusters in which fewer than 90% of enhancers were DNase  
627 hypersensitive in their most active tissue, resulting in 474 clusters – averaging ~16  
628 enhancers each, though ranging to over 100. Similar to above (see ‘AP Enhancers’) we  
629 used Hi-C data to screen enhancers in each AP that were less spatially proximal, on  
630 average, to the remaining members. To prevent excessive removal of additional  
631 enhancers, given the already modest mean pre-screen AP size, we implemented the Hi-C  
632 screen in a single pass, without recursively updating each enhancer’s mean Hi-C score  
633 after removal of a fellow AP member. This resulted in 472 non-empty APs with an  
634 average of ~15 enhancers each.

635 For background control, we used the complement of P300 ChIP-Seq peaks overlapping  
636 any of the screened set of approximately 2.6M Sheffield et al DNase hypersensitive  
637 regions. This resulted in too few putative enhancers, and so to this we added back ChIP-  
638 Seq peaks overlapping any cluster (on one chromosome) of hypersensitive regions with  
639 fewer than five members and with mean DHS > 50 in its most active cell type; this  
640 produced a background pool of ~18K enhancers. Non-AP enhancers from this set were  
641 matched with AP enhancers as described above. In order to accommodate the smaller  
642 APs in this alternative dataset, we loosened the stringency on DHS control such that  
643 mean DHS was matched to within 1% for AP and non-AP sets, overall, with mean DHS

644 for individual TF-AP combinations constrained to less than double or more than half the  
645 mean DHS of their non-AP counterpart.

646 **TF expression-AP activity correlation.** This analysis used data from each of 15 cell  
647 lines for every AP, encompassing ~2.4 million BS. Each (TF, AP enhancer, cell line)  
648 triplet was assigned (i) a DHS value, corresponding to AP enhancer and cell line; (ii) a  
649 coverage score, corresponding to AP enhancer and TF; (iii) a normalized RNA-Seq value  
650 corresponding to TF and cell line. Analysis was limited to triplets with a coverage score  
651 in the top and bottom 20%. In each of these coverage classes, triplets were further sorted  
652 based on the TF's expression in the given cell line and screened to include only triplets  
653 with top or, alternatively, bottom 20 (or 25 or 50) percent TF expression. For each  
654 coverage class, the percentage difference in mean cell-type specific DHS between the low  
655 TF expression and high TF expression cohorts was plotted. Confidence intervals for each  
656 percentage difference were computed on the basis of 50K bootstrap replicates.

### 657 **H3K27Ac levels**

658 We downloaded Encode ChIP-Seq peaks from human umbilical vein cells (HUVEC) for  
659 histone mark H3K27Ac, known to be associated with active enhancer states (Calo and  
660 Wysocka 2013). This cell line was chosen for its combination of available data and a large  
661 number of enhancers in APs that are active in the cell line. We compared the ratio in  
662 mean ChIP-Seq levels between top 10% enriched and top 10% depleted AP enhancers to  
663 the same ratio for non-AP enhancers, matched one-to-one with the AP enhancers as  
664 described above. An AP enhancer and its matched non-AP enhancer were included only  
665 if the AP enhancer belonged to an AP that was 'active' in HUVEC (>80% of its enhancers  
666 was DNase hypersensitive). This resulted in ~40 enriched and ~100 depleted AP  
667 enhancers, and the same number of non-AP enhancers.

### 668 **Supplemental information includes:**

669  
670 Facilitated Diffusion Model  
671 Extended Experimental Procedures  
672 1 Supplemental Data File  
673 5 Supplemental Figures and Legends  
674

### 675 **Acknowledgements**

676 JM wishes to thank Ivan Ovcharenko for valuable feedback throughout the process, and Avinash  
677 Das, Kun Wang, and Mahfuza Sharmin for technical assistance.  
678  
679

680 **Author Contributions**

681 Designed analysis: JM with help from SH and SM. Performed analysis JM with help from HK.  
682 Biophysical modelling and simulations: DE, XM. Crowdsourcing mechanism and functional  
683 implications: JM. Wrote paper: JM, SH, DE. All authors reviewed paper. SGP helped with  
684 illustrations.

685  
686 **References**

- 687 Arnold CD, Gerlach D, Spies D, Matts J a, Sytnikova Y a, Pagani M, Lau NC, Stark A. 2014.  
688 Quantitative genome-wide enhancer activity maps for five *Drosophila* species show  
689 functional enhancer conservation and turnover during cis-regulatory evolution. *Nat Genet*  
690 **46**: 685–92. <http://www.ncbi.nlm.nih.gov/pubmed/24908250> (Accessed July 9, 2014).
- 691 Arvey A, Agius P, Noble WS, Leslie C. 2012. Sequence and chromatin determinants of cell-type-  
692 specific transcription factor binding. *Genome Res* **22**: 1723–34.  
693 [http://www.pubmedcentral.nih.gov/articlerender.fcgi?artid=3431489&tool=pmcentrez&re](http://www.pubmedcentral.nih.gov/articlerender.fcgi?artid=3431489&tool=pmcentrez&rendertype=abstract)  
694 [ndertype=abstract](http://www.pubmedcentral.nih.gov/articlerender.fcgi?artid=3431489&tool=pmcentrez&rendertype=abstract) (Accessed July 18, 2014).
- 695 Ay F, Bunnik EM, Varoquaux N, Bol SM, Prudhomme J, Vert JP, Noble WS, Le Roch KG. 2014.  
696 Three-dimensional modeling of the *P. falciparum* genome during the erythrocytic cycle  
697 reveals a strong connection between genome architecture and gene expression. *Genome*  
698 *Res* **24**: 974–988.
- 699 Babaei S, Akhtar W, de Jong J, Reinders M, de Ridder J. 2015. 3D hotspots of recurrent  
700 retroviral insertions reveal long-range interactions with cancer genes. *Nat Commun* **6**:  
701 6381. <http://www.nature.com/doi/10.1038/ncomms7381>.
- 702 Barozzi I, Simonatto M, Bonifacio S, Yang L, Rohs R, Ghisletti S, Natoli G. 2014. Coregulation of  
703 Transcription Factor Binding and Nucleosome Occupancy through DNA Features of  
704 Mammalian Enhancers. *Mol Cell* **54**: 844–857.  
705 <http://dx.doi.org/10.1016/j.molcel.2014.04.006>.
- 706 Biggin MD. 2011. Animal transcription networks as highly connected, quantitative continua.  
707 *Dev Cell* **21**: 611–26. <http://www.ncbi.nlm.nih.gov/pubmed/22014521> (Accessed March 3,  
708 2013).
- 709 Brackley C a., Cates ME, Marenduzzo D. 2012. Facilitated diffusion on mobile DNA:  
710 Configurational traps and sequence heterogeneity. *Phys Rev Lett* **109**: 1–5.
- 711 Calo E, Wysocka J. 2013. Modification of Enhancer Chromatin: What, How, and Why? *Mol Cell*  
712 **49**: 825–837. <http://dx.doi.org/10.1016/j.molcel.2013.01.038>.
- 713 Chakalova L, Fraser P. 2010. Organization of transcription. *Cold Spring Harb Perspect Biol* **2**:  
714 a000729.  
715 [http://www.pubmedcentral.nih.gov/articlerender.fcgi?artid=2926752&tool=pmcentrez&re](http://www.pubmedcentral.nih.gov/articlerender.fcgi?artid=2926752&tool=pmcentrez&rendertype=abstract)  
716 [ndertype=abstract](http://www.pubmedcentral.nih.gov/articlerender.fcgi?artid=2926752&tool=pmcentrez&rendertype=abstract).
- 717 Crocker J, Abe N, Rinaldi L, McGregor AP, Frankel N, Wang S, Alsawadi A, Valenti P, Plaza S,  
718 Payre F, et al. 2015. Low Affinity Binding Site Clusters Confer Hox Specificity and  
719 Regulatory Robustness. *Cell* 191–203.

- 720 Deng W, Lee J, Wang H, Miller J, Reik A, Gregory PD, Dean A, Blobel G a. 2012. Controlling  
721 long-range genomic interactions at a native locus by targeted tethering of a looping factor.  
722 *Cell* **149**: 1233–44.  
723 [http://www.pubmedcentral.nih.gov/articlerender.fcgi?artid=3372860&tool=pmcentrez&](http://www.pubmedcentral.nih.gov/articlerender.fcgi?artid=3372860&tool=pmcentrez&endertype=abstract)  
724 [endertype=abstract](http://www.pubmedcentral.nih.gov/articlerender.fcgi?artid=3372860&tool=pmcentrez&endertype=abstract) (Accessed August 14, 2014).
- 725 Djebali S, Davis C a., Merkel A, Dobin A, Lassmann T, Mortazavi A, Tanzer A, Lagarde J, Lin W,  
726 Schlesinger F, et al. 2012. Landscape of transcription in human cells. *Nature* **489**: 101–  
727 108.
- 728 Downen JM, Fan ZP, Hnisz D, Ren G, Abraham BJ, Zhang LN, Weintraub AS, Schuijers J, Lee TI,  
729 Zhao K, et al. 2014. Control of Cell Identity Genes Occurs in Insulated Neighborhoods in  
730 Mammalian Chromosomes. *Cell* **159**: 374–387.  
731 <http://dx.doi.org/10.1016/j.cell.2014.09.030>.
- 732 Edelman LB, Fraser P. 2012. Transcription factories: genetic programming in three dimensions.  
733 *Curr Opin Genet Dev* **22**: 110–4. <http://www.ncbi.nlm.nih.gov/pubmed/22365496>  
734 (Accessed August 7, 2013).
- 735 Essien K, Vigneau S, Apreleva S, Singh LN, Bartolomei MS, Hannehalli S. 2009. CTCF binding  
736 site classes exhibit distinct evolutionary, genomic, epigenomic and transcriptomic features.  
737 *Genome Biol* **10**: R131.  
738 [http://www.pubmedcentral.nih.gov/articlerender.fcgi?artid=3091324&tool=pmcentrez&](http://www.pubmedcentral.nih.gov/articlerender.fcgi?artid=3091324&tool=pmcentrez&endertype=abstract)  
739 [endertype=abstract](http://www.pubmedcentral.nih.gov/articlerender.fcgi?artid=3091324&tool=pmcentrez&endertype=abstract) (Accessed March 14, 2013).
- 740 Ezer D, Zabet NR, Adryan B. 2014a. Homotypic clusters of transcription factor binding sites: A  
741 model system for understanding the physical mechanics of gene expression. *Comput Struct*  
742 *Biotechnol J* **10**: 63–9.  
743 [http://www.pubmedcentral.nih.gov/articlerender.fcgi?artid=4204428&tool=pmcentrez&](http://www.pubmedcentral.nih.gov/articlerender.fcgi?artid=4204428&tool=pmcentrez&endertype=abstract)  
744 [endertype=abstract](http://www.pubmedcentral.nih.gov/articlerender.fcgi?artid=4204428&tool=pmcentrez&endertype=abstract) (Accessed November 3, 2014).
- 745 Ezer D, Zabet NR, Adryan B. 2014b. Physical constraints determine the logic of bacterial  
746 promoter architectures. *Nucleic Acids Res* **42**: 4196–4207.
- 747 Filippova D, Patro R, Duggal G, Kingsford C. 2013. Multiscale identification of topological  
748 domains in chromatin. *Lect Notes Comput Sci (including Subser Lect Notes Artif Intell*  
749 *Lect Notes Bioinformatics)* **8126 LNBI**: 300–312. Algorithms for Molecular Biology.
- 750 Fisher WW, Li JJ, Hammonds AS, Brown JB, Pfeiffer BD, Weiszmann R, MacArthur S, Thomas  
751 S, Stamatoyannopoulos J a, Eisen MB, et al. 2012. DNA regions bound at low occupancy by  
752 transcription factors do not drive patterned reporter gene expression in *Drosophila*. *Proc*  
753 *Natl Acad Sci* **109**: 21330–5.  
754 <http://www.pnas.org/content/early/2012/12/05/1209589110.abstract> (Accessed February  
755 28, 2013).
- 756 Foat BC, Morozov A V, Bussemaker HJ. 2006. Statistical mechanical modeling of genome-wide  
757 transcription factor occupancy data by MatrixREDUCE. *Bioinformatics* **22**: e141–9.  
758 <http://www.ncbi.nlm.nih.gov/pubmed/16873464> (Accessed February 28, 2013).
- 759 Fraser P. 2006. Transcriptional control thrown for a loop. *Curr Opin Genet Dev* **16**: 490–5.  
760 <http://www.ncbi.nlm.nih.gov/pubmed/16904310> (Accessed November 3, 2013).
- 761 Fullwood MJ, Liu MH, Pan YF, Liu J, Xu H, Mohamed Y Bin, Orlov YL, Velkov S, Ho A, Mei PH,  
762 et al. 2009. An oestrogen-receptor-alpha-bound human chromatin interactome. *Nature*

- 763 **462**: 58–64.  
764 [http://www.pubmedcentral.nih.gov/articlerender.fcgi?artid=2774924&tool=pmcentrez&re](http://www.pubmedcentral.nih.gov/articlerender.fcgi?artid=2774924&tool=pmcentrez&rendertype=abstract)  
765 [ndertype=abstract](http://www.pubmedcentral.nih.gov/articlerender.fcgi?artid=2774924&tool=pmcentrez&rendertype=abstract) (Accessed February 28, 2013).
- 766 Ghavi-Helm Y, Klein F a., Pakozdi T, Ciglar L, Noordermeer D, Huber W, Furlong EEM. 2014.  
767 Enhancer loops appear stable during development and are associated with paused  
768 polymerase. *Nature* **512**: 96–100. <http://www.nature.com/doi/10.1038/nature13417>  
769 (Accessed July 9, 2014).
- 770 Gotea V, Visel A, Westlund JM, Nobrega M a, Pennacchio L a, Ovcharenko I. 2010. Homotypic  
771 clusters of transcription factor binding sites are a key component of human promoters and  
772 enhancers. *Genome Res* **20**: 565–77.  
773 [http://www.pubmedcentral.nih.gov/articlerender.fcgi?artid=2860159&tool=pmcentrez&re](http://www.pubmedcentral.nih.gov/articlerender.fcgi?artid=2860159&tool=pmcentrez&rendertype=abstract)  
774 [ndertype=abstract](http://www.pubmedcentral.nih.gov/articlerender.fcgi?artid=2860159&tool=pmcentrez&rendertype=abstract) (Accessed October 24, 2014).
- 775 Hannenhalli S. 2008. Eukaryotic transcription factor binding sites - Modeling and integrative  
776 search methods. *Bioinformatics* **24**: 1325–1331.
- 777 He X, Duque TSPC, Sinha S. 2012a. Evolutionary origins of transcription factor binding site  
778 clusters. *Mol Biol Evol* **29**: 1059–1070.
- 779 He X, Duque TSPC, Sinha S. 2012b. Evolutionary origins of transcription factor binding site  
780 clusters. *Mol Biol Evol* **29**: 1059–70.  
781 [http://www.pubmedcentral.nih.gov/articlerender.fcgi?artid=3278477&tool=pmcentrez&re](http://www.pubmedcentral.nih.gov/articlerender.fcgi?artid=3278477&tool=pmcentrez&rendertype=abstract)  
782 [ndertype=abstract](http://www.pubmedcentral.nih.gov/articlerender.fcgi?artid=3278477&tool=pmcentrez&rendertype=abstract) (Accessed June 8, 2013).
- 783 Heinz S, Romanoski CE, Benner C, Allison K a, Kaikkonen MU, Orozco LD, Glass CK. 2013.  
784 Effect of natural genetic variation on enhancer selection and function. *Nature* **503**: 487–  
785 492. <http://www.ncbi.nlm.nih.gov/pubmed/24121437> (Accessed November 7, 2013).
- 786 Heinz S, Romanoski CE, Benner C, Glass CK. 2015. The selection and function of cell type-  
787 specific enhancers. *Nat Rev Mol Cell Biol* **16**: 144–154.  
788 <http://dx.doi.org/10.1038/nrm3949>.
- 789 Hesselberth JR, Chen X, Zhang Z, Sabo PJ, Sandstrom R, Reynolds AP, Thurman RE, Neph S,  
790 Kuehn MS, Noble WS, et al. 2009. Global mapping of protein-DNA interactions in vivo by  
791 digital genomic footprinting. **6**: 283–289.
- 792 Ing-simmons E, Seitan VC, Faure AJ, Flicek P, Dekker J, Fisher AG, Lenhard B, Merckenschlager  
793 M. 2014. Spatial enhancer clustering and regulation of enhancer-proximal genes by  
794 cohesin.
- 795 Levy S, Hannenhalli S. 2002. Identification of transcription factor binding sites in the human  
796 genome sequence. **514**: 510–514.
- 797 Li G, Ruan X, Auerbach RK, Sandhu KS, Zheng M, Wang P, Poh HM, Goh Y, Lim J, Zhang J, et  
798 al. 2012. Extensive promoter-centered chromatin interactions provide a topological basis  
799 for transcription regulation. *Cell* **148**: 84–98.  
800 [http://www.pubmedcentral.nih.gov/articlerender.fcgi?artid=3339270&tool=pmcentrez&re](http://www.pubmedcentral.nih.gov/articlerender.fcgi?artid=3339270&tool=pmcentrez&rendertype=abstract)  
801 [ndertype=abstract](http://www.pubmedcentral.nih.gov/articlerender.fcgi?artid=3339270&tool=pmcentrez&rendertype=abstract) (Accessed February 27, 2013).
- 802 Lieberman-aiden E, Berkum NL Van, Williams L, Imakaev M, Ragoczy T, Telling A, Amit I,  
803 Lajoie BR, Sabo PJ, Dorschner MO, et al. 2009. of the Human Genome. **33292**: 289–294.



- 804 Malin J, Aniba MR, Hannenhalli S. 2013. Enhancer networks revealed by correlated DNase  
805 hypersensitivity states of enhancers. *Nucleic Acids Res* **41**: 6828–38.  
806 [http://www.pubmedcentral.nih.gov/articlerender.fcgi?artid=3737527&tool=pmcentrez&re](http://www.pubmedcentral.nih.gov/articlerender.fcgi?artid=3737527&tool=pmcentrez&rendertype=abstract)  
807 [ndertype=abstract](http://www.pubmedcentral.nih.gov/articlerender.fcgi?artid=3737527&tool=pmcentrez&rendertype=abstract) (Accessed October 26, 2013).
- 808 Markenscoff-Papadimitriou E, Allen WE, Colquitt BM, Goh T, Murphy KK, Monahan K, Mosley  
809 CP, Ahituv N, Lomvardas S. 2014. Enhancer Interaction Networks as a Means for Singular  
810 Olfactory Receptor Expression. *Cell* **159**: 543–557.  
811 <http://linkinghub.elsevier.com/retrieve/pii/S0092867414011829> (Accessed October 24,  
812 2014).
- 813 Martinez GJ, Rao A. 2012. Immunology. Cooperative transcription factor complexes in control.  
814 *Science* **338**: 891–2.  
815 [http://www.pubmedcentral.nih.gov/articlerender.fcgi?artid=3621126&tool=pmcentrez&re](http://www.pubmedcentral.nih.gov/articlerender.fcgi?artid=3621126&tool=pmcentrez&rendertype=abstract)  
816 [ndertype=abstract](http://www.pubmedcentral.nih.gov/articlerender.fcgi?artid=3621126&tool=pmcentrez&rendertype=abstract).
- 817 Matys V, Kel-Margoulis O V, Fricke E, Liebich I, Land S, Barre-Dirrie a, Reuter I, Chekmenev D,  
818 Krull M, Hornischer K, et al. 2006. TRANSFAC and its module TRANSCompel:  
819 transcriptional gene regulation in eukaryotes. *Nucleic Acids Res* **34**: D108–D110.
- 820 Montavon T, Duboule D. 2012. Landscapes and archipelagos: spatial organization of gene  
821 regulation in vertebrates. *Trends Cell Biol* **22**: 347–54.  
822 <http://www.ncbi.nlm.nih.gov/pubmed/22560708> (Accessed October 20, 2013).
- 823 Moses AM, Chiang DY, Pollard D a, Iyer VN, Eisen MB. 2004. MONKEY: identifying conserved  
824 transcription-factor binding sites in multiple alignments using a binding site-specific  
825 evolutionary model. *Genome Biol* **5**: R98.
- 826 Neph S, Vierstra J, Stergachis AB, Reynolds AP, Haugen E, Vernot B, Thurman RE, John S,  
827 Sandstrom R, Johnson AK, et al. 2012. An expansive human regulatory lexicon encoded in  
828 transcription factor footprints. *Nature* **489**: 83–90.  
829 <http://www.ncbi.nlm.nih.gov/pubmed/22955618> (Accessed February 28, 2013).
- 830 Plank JL, Dean A. 2014. Enhancer Function: Mechanistic and Genome-Wide Insights Come  
831 Together. *Mol Cell* **55**: 5–14. <http://www.ncbi.nlm.nih.gov/pubmed/24996062> (Accessed  
832 July 10, 2014).
- 833 Pombo A, Dillon N. 2015. Three-dimensional genome architecture: players and mechanisms.  
834 *Nat Rev Mol Cell Biol* **16**: 245–257. <http://www.nature.com/doifinder/10.1038/nrm3965>.
- 835 Ramos AI, Barolo S. 2013. Low-affinity transcription factor binding sites shape morphogen  
836 responses and enhancer evolution. *Philos Trans R Soc Lond B Biol Sci* **368**: 20130018.  
837 <http://rstb.royalsocietypublishing.org/content/368/1632/20130018.short?rss=1>.
- 838 Schoenfelder S, Clay I, Fraser P. 2010a. The transcriptional interactome: gene expression in 3D.  
839 *Curr Opin Genet Dev* **20**: 127–33. <http://www.ncbi.nlm.nih.gov/pubmed/20211559>  
840 (Accessed October 18, 2013).
- 841 Schoenfelder S, Sexton T, Chakalova L, Cope NF, Horton A, Andrews S, Kurukuti S, Mitchell J a,  
842 Umlauf D, Dimitrova DS, et al. 2010b. Preferential associations between co-regulated genes  
843 reveal a transcriptional interactome in erythroid cells. *Nat Genet* **42**: 53–61.  
844 [http://www.pubmedcentral.nih.gov/articlerender.fcgi?artid=3237402&tool=pmcentrez&r](http://www.pubmedcentral.nih.gov/articlerender.fcgi?artid=3237402&tool=pmcentrez&rendertype=abstract)  
845 [endertype=abstract](http://www.pubmedcentral.nih.gov/articlerender.fcgi?artid=3237402&tool=pmcentrez&rendertype=abstract) (Accessed October 18, 2013).

- 846 Schwarzer W, Spitz F. 2014. The architecture of gene expression: integrating dispersed cis-  
847 regulatory modules into coherent regulatory domains. *Curr Opin Genet Dev* **27**: 74–82.  
848 <http://www.ncbi.nlm.nih.gov/pubmed/24907448> (Accessed September 22, 2014).
- 849 Sharon E, Kalma Y, Sharp A, Raveh-Sadka T, Levo M, Zeevi D, Keren L, Yakhini Z, Weinberger  
850 A, Segal E. 2012. Inferring gene regulatory logic from high-throughput measurements of  
851 thousands of systematically designed promoters. *Nat Biotechnol* **30**: 521–30.  
852 [http://www.pubmedcentral.nih.gov/articlerender.fcgi?artid=3374032&tool=pmcentrez&re  
853 ndertype=abstract](http://www.pubmedcentral.nih.gov/articlerender.fcgi?artid=3374032&tool=pmcentrez&rendertype=abstract) (Accessed December 5, 2014).
- 854 Sheffield NC, Thurman RE, Song L, Safi A, Stamatoyannopoulos J a, Lenhard B, Crawford GE,  
855 Furey TS. 2013. Patterns of regulatory activity across diverse human cell types predict  
856 tissue identity, transcription factor binding, and long-range interactions. *Genome Res* **23**:  
857 777–88.  
858 [http://www.pubmedcentral.nih.gov/articlerender.fcgi?artid=3638134&tool=pmcentrez&re  
859 ndertype=abstract](http://www.pubmedcentral.nih.gov/articlerender.fcgi?artid=3638134&tool=pmcentrez&rendertype=abstract) (Accessed January 22, 2014).
- 860 Siepel A, Bejerano G, Pedersen JS, Hinrichs AS, Hou M, Rosenbloom K, Clawson H, Spieth J,  
861 Hillier LW, Richards S, et al. 2005. Evolutionarily conserved elements in vertebrate, insect,  
862 worm, and yeast genomes. *Genome Res* **15**: 1034–1050.
- 863 Slattery M, Zhou T, Yang L, Dantas Machado AC, Gordân R, Rohs R. 2014. Absence of a simple  
864 code: how transcription factors read the genome. *Trends Biochem Sci* **39**: 381–399.
- 865 Smith RP, Taher L, Patwardhan RP, Kim MJ, Inoue F, Shendure J, Ovcharenko I, Ahituv N.  
866 2013. Massively parallel decoding of mammalian regulatory sequences supports a flexible  
867 organizational model. *Nat Genet* **45**: 1021–8.  
868 [http://www.pubmedcentral.nih.gov/articlerender.fcgi?artid=3775494&tool=pmcentrez&re  
869 ndertype=abstract](http://www.pubmedcentral.nih.gov/articlerender.fcgi?artid=3775494&tool=pmcentrez&rendertype=abstract) (Accessed July 14, 2014).
- 870 Spitz F, Furlong EEM. 2012. Transcription factors: from enhancer binding to developmental  
871 control. *Nat Rev Genet* **13**: 613–26. <http://www.ncbi.nlm.nih.gov/pubmed/22868264>  
872 (Accessed September 17, 2013).
- 873 Stewart AJ, Hannonhalli S, Plotkin JB. 2012. Why transcription factor binding sites are ten  
874 nucleotides long. *Genetics* **192**: 973–85. <http://www.ncbi.nlm.nih.gov/pubmed/22887818>  
875 (Accessed September 19, 2013).
- 876 Stewart AJ, Plotkin JB. 2013. The evolution of complex gene regulation by low-specificity  
877 binding sites. *Proc Biol Sci* **280**: 20131313.  
878 <http://www.ncbi.nlm.nih.gov/pubmed/23945682>.
- 879 Taher L, Smith RP, Kim MJ, Ahituv N, Ovcharenko I. 2013. Sequence signatures extracted from  
880 proximal promoters can be used to predict distal enhancers. *Genome Biol* **14**: R117.  
881 <http://www.ncbi.nlm.nih.gov/pubmed/24156763> (Accessed October 30, 2013).
- 882 Tanay A. 2006. Extensive low-affinity transcriptional interactions in the yeast genome. *Genome*  
883 *Res* **16**: 962–72.  
884 [http://www.pubmedcentral.nih.gov/articlerender.fcgi?artid=1524868&tool=pmcentrez&re  
885 ndertype=abstract](http://www.pubmedcentral.nih.gov/articlerender.fcgi?artid=1524868&tool=pmcentrez&rendertype=abstract) (Accessed October 2, 2014).
- 886 Teif VB, Rippe K. 2012. Calculating transcription factor binding maps for chromatin. *Brief*  
887 *Bioinform* **13**: 187–201.

- 888 Vahedi G, Kanno Y, Furumoto Y, Jiang K, Parker SCJ, Erdos MR, Davis SR, Roychoudhuri R,  
889 Restifo NP, Gadina M, et al. 2015. Super-enhancers delineate disease-associated regulatory  
890 nodes in T cells. *Nature*. <http://www.nature.com/doi/10.1038/nature14154>.
- 891 Vernimmen D. 2014. Uncovering Enhancer Functions Using the  $\alpha$ -Globin Locus. *PLoS Genet*  
892 **10**: e1004668.  
893 [http://www.pubmedcentral.nih.gov/articlerender.fcgi?artid=4199490&tool=pmcentrez&re](http://www.pubmedcentral.nih.gov/articlerender.fcgi?artid=4199490&tool=pmcentrez&rendertype=abstract)  
894 [ndertype=abstract](http://www.pubmedcentral.nih.gov/articlerender.fcgi?artid=4199490&tool=pmcentrez&rendertype=abstract) (Accessed October 24, 2014).
- 895 Wasson T, Hartemink AJ. 2009. An ensemble model of competitive multi-factor binding of the  
896 genome. *Genome Res* **19**: 2101–2112.
- 897 White MA, Myers CA, Corbo JC, Cohen BA. 2013. Massively parallel in vivo enhancer assay  
898 reveals that highly local features determine the cis -regulatory function of ChIP-seq peaks.
- 899 Whyte WA, Orlando DA, Hnisz D, Abraham BJ, Lin CY, Kagey MH, Rahl PB, Lee TI, Young RA.  
900 2013. Master Transcription Factors and Mediator Establish Super-Enhancers at Key Cell  
901 Identity Genes. *Cell* **153**: 307–319. <http://dx.doi.org/10.1016/j.cell.2013.03.035>.
- 902 Yáñez-Cuna JO, Dinh HQ, Kvon EZ, Shlyueva D, Stark A. 2012. Uncovering cis-regulatory  
903 sequence requirements for context-specific transcription factor binding. *Genome Res* **22**:  
904 2018–30.  
905 [http://www.pubmedcentral.nih.gov/articlerender.fcgi?artid=3460196&tool=pmcentrez&re](http://www.pubmedcentral.nih.gov/articlerender.fcgi?artid=3460196&tool=pmcentrez&rendertype=abstract)  
906 [ndertype=abstract](http://www.pubmedcentral.nih.gov/articlerender.fcgi?artid=3460196&tool=pmcentrez&rendertype=abstract) (Accessed November 6, 2014).
- 907 Zinzen RP, Girardot C, Gagneur J, Braun M, Furlong EEM. 2009. Combinatorial binding  
908 predicts spatio-temporal cis-regulatory activity. *Nature* **462**: 65–70.  
909 <http://www.ncbi.nlm.nih.gov/pubmed/19890324> (Accessed March 1, 2013).

910

911

912

913

914

915

916

917

918

919

920

921

922

923 **Figures and Legends**

924

925 **Figure 1. Expectation and testing of differential occupancy**

926 **(A)** The combination of spatial proximity and genomic homotypic clusters of TFBS produce  
927 high homotypic TF BS concentration. As illustrated, low-RE (degenerate) motif BS have a higher  
928 expected frequency in the genome than high-RE motif BS, including more frequent HCTs. In a  
929 spatially proximal chromatin context, effective homotypic BS concentrations are particularly  
930 elevated for low-RE motif BS. This effect is further accentuated in archipelagos of enhancers,  
931 which have been shown to be enriched for HCTs for shared TFs. High effective homotypic BS  
932 concentration is likely a pre-requisite for the crowdsourcing effect. Large ovals denote  
933 archipelagos of functionally related enhancers and target genes. Darkness of background color  
934 approximates the maximum expected homotypic BS concentration. Not drawn to scale. Green:  
935 DNA. Black: BS. BS=binding site; RE=relative entropy; HCT = homotypic (genomic) cluster of  
936 TFBS.

937 **(B)** Calculating differential TF occupancy boost based on curated digital DNase footprint data.  
938 Shown is the procedure for calculating occupancy boost for each (AP, TF) pair. For each  
939 enhancer in an AP, and each TF with one or more putative BS in the enhancer, a non-AP  
940 enhancer is chosen (with replacement) after controlling for mean enhancer-wide chromatin  
941 accessibility (DHS) in the AP's most active tissue, and for the number of putative BS. For each  
942 TF-AP pair, then, occupancy boost is calculated as the percent difference in the number of  
943 putatively bound BS, where binding is determined in a binary manner: **1**, if a curated footprint  
944 tightly overlaps a given motif instance, **0**, otherwise. If multiple TF motifs tightly overlap a given  
945 footprint, conservatively, all are classified as bound. Putative BS are indicated by a '1', or '2',  
946 respectively, for example TFs SOX and XBP1. A circle around a BS signifies it is imputed as  
947 bound by its cognate TF. Note that the toy calculation of occupancy boost does not correspond  
948 to the data displayed. AP = archipelago; TF = transcription factor, BS = binding site. DNase  
949 digital footprint scans from Neph et al 2012.

950

951

952

953

954

955

956

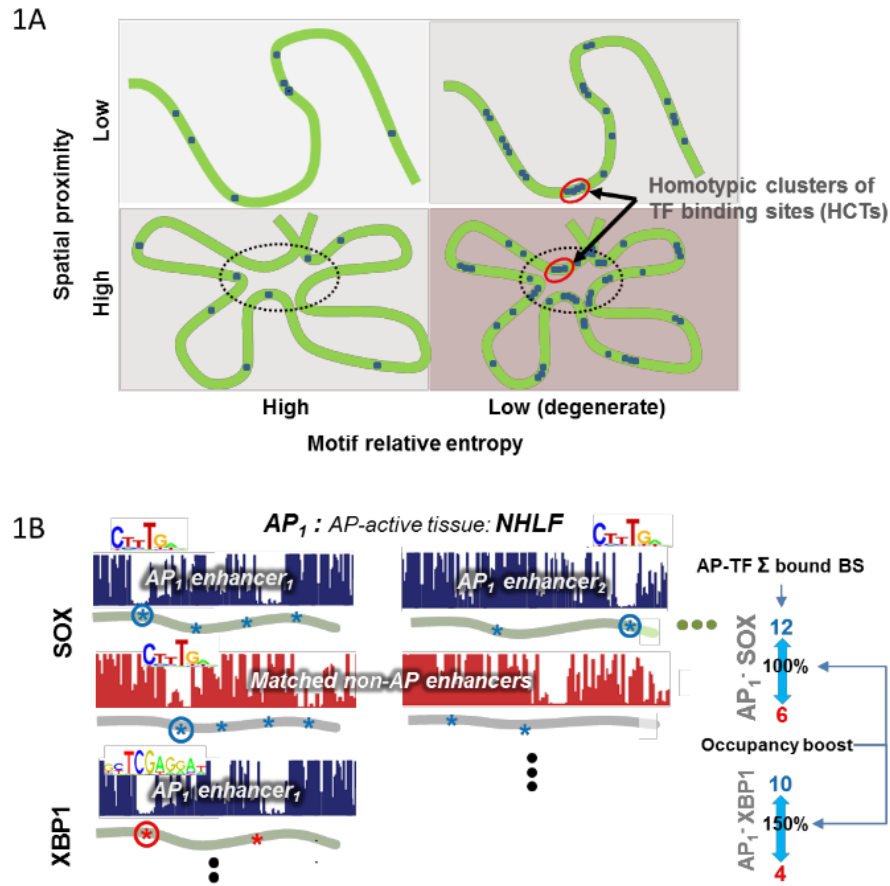

957

958

959 **Figure 2. Differential AP occupancy ‘boost’ scales with TF coverage in the AP**

960 TF-AP combinations were sorted on the basis of coverage and mean occupancy boost was  
 961 determined for each group of TF-APs, where occupancy boost refers to differential occupancy in  
 962 AP and non-AP enhancers matched 1-to-1 for the TF’s motif signature (the number and type of  
 963 motifs) in a given enhancer, as well as for mean DHS across the AP. Occupancy was calculated  
 964 based on the overlap of curated DNase digital footprints (Neph et al 2012) with high-confidence  
 965 TRANSFAC motif instances. TF-APs and their non-AP counterparts were included in this  
 966 analysis only if they both had non-zero occupancy (See also Figures S1, S2, S3). Coverage was  
 967 calculated alternatively as:

968 **(A)** the number of cognate BS for a given TF in a given AP or **(B)** the number of enhancers in  
 969 the AP with one or more motif instances cognate to the TF. **(C)** There is a strong inverse  
 970 relationship between TF-AP coverage and TF relative entropy, as expected. TF-APs with the top  
 971 (salmon) and bottom (green) 20% coverage were mapped to the TFs’ RE values. Colors in 2A  
 972 and 2B illustrative and do not coincide with these coverage ranges. AP: archipelago, RE =

973 relative entropy. **(D)** Mean occupancy boost versus coverage that has been decomposed along  
 974 two axes. Each TF-AP pair was binned based on the number of enhancers in an AP (column) and  
 975 the mean number of BS per AP enhancer (row). Plots to the left of and below the heatplot show  
 976 mean boost for each row and column, respectively. Red (green) heatmap cells indicate high  
 977 (low) percentage occupancy boost after Lowess smoothing. Grey cells indicate no data. In the  
 978 right panel, for all TF-AP pairs in the selected heatmap cell, significant digital DNase  
 979 hypersensitivity footprints in member AP and matched non-AP enhancers are shown, where the  
 980 numbers of BS for AP and non-AP enhancer-TF pairs are identical; a blue line indicates a  
 981 significant footprint overlapping a putative BS. Enhancers are sorted from bottom to top in  
 982 order of increasing chromatin accessibility.

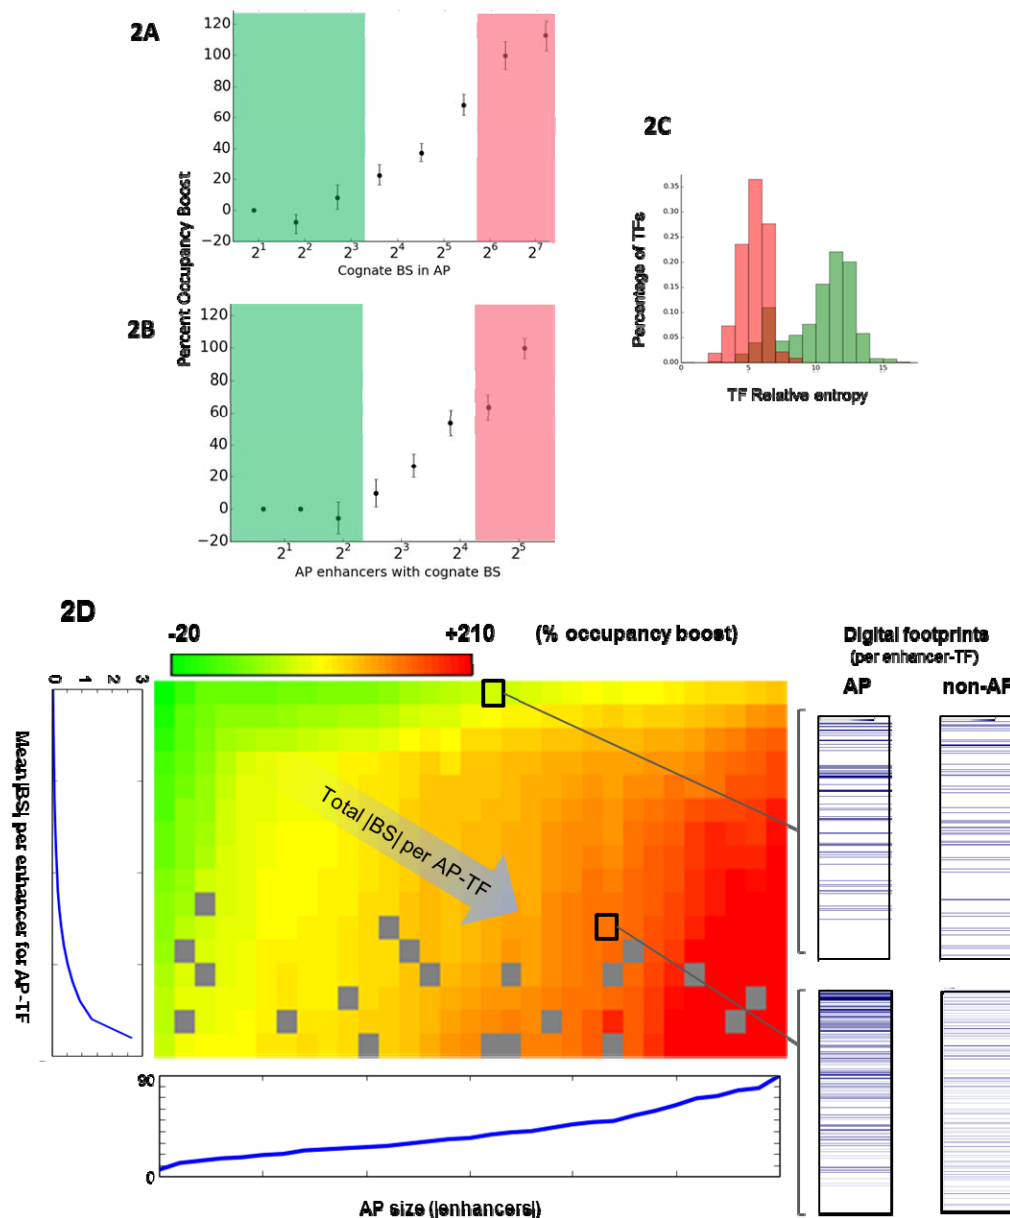

983

984

### 985 **Figure 3. Biophysically modeling crowdsourcing effect**

986 TF diffusion was simulated for four geometric arrangements of binding sites, and the probability  
987 density functions of TF occupancy are shown. The TF occupancy is defined as the average  
988 probability that each site is bound. The four simulated scenarios are: a tetrahedron with **(A)** one  
989 binding site or **(B)** a pair of binding sites in each corner, which contain 4 or 8 binding sites,  
990 respectively; a cube with **(C)** a single binding site or **(D)** a pair of binding sites in each corner,  
991 which contain 8 and 16 binding sites respectively. For an additional figure and details on the  
992 simulation, see Supplemental Methods.

993

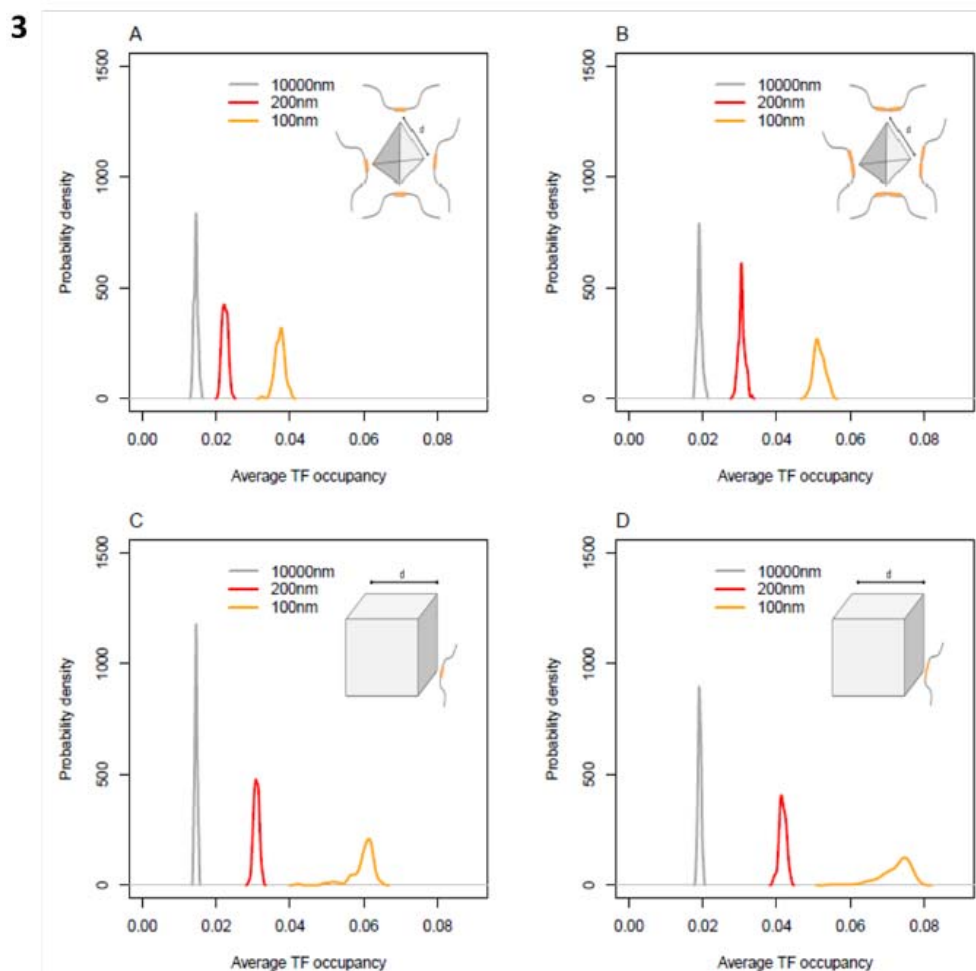

994

995

996

997

998

999 **Figure 4. Enhancers enriched for degenerate BS are more functional than**  
1000 **expected**

1001 **(A)** Enhancers enriched and depleted for low-RE BS were compared in terms of DNase  
1002 hypersensitivity (row 2), evolutionary constraint (row 3), and neighbor gene expression (row 4).  
1003 Readouts on y-axes indicate values normalized against carefully matched non-AP enhancers for  
1004 the given RE cutoff (column). Within each plot, the 10%, 20%, and 50% (x-axis) most enriched  
1005 enhancers are indicated in non-grey, while the most depleted enhancers are shown in grey. The  
1006 histograms in the top row indicate the fraction (green) of all TFs deemed low-RE for the purpose  
1007 of calculating each enhancer's low-RE BS enrichment.

1008 Figures **(B-E)** are for RE cutoff = 5. **(B)** Chromatin accessibility of AP and matched non-AP  
1009 enhancers, sorted by low-RE motif enrichment. Aligned heatplots display one enhancer per row  
1010 (most enriched at top). (Left) heatplot in which red signifies a low-RE motif and blue a high-RE  
1011 motif. Low-RE motif enrichment based on Fisher exact test against a background that included  
1012 all non-AP enhancers. For visualization purposes, enhancer lengths and BS lengths  
1013 standardized. (left, right). Log of non-AP and AP enhancer DHS, respectively. (See also Figure  
1014 S4). **(C)** Percentage occupancy boost is shown as a function of coverage for AP enhancers with  
1015 the highest 20% enrichment (blue line) and the highest 20% depletion (green line) for low-RE  
1016 BS, along with their 95% confidence intervals. Coverage for a given TF-AP pair was calculated as  
1017 the number of cognate BS in in the AP among enriched (depleted) enhancers only. A p-value is  
1018 given for a Wilcoxon test comparing boosts among TF-APs with top 20% coverage. **(D)** Ratio of  
1019 low-RE to high-RE motifs in AP enhancers vs. non-AP enhancers. AP and non-AP enhancers  
1020 were matched one-to-one for DHS in each AP enhancer's most active tissue. Putative BS were  
1021 identified based on 95 percentile motif match threshold. The x-axis shows the ratio of low-RE to  
1022 high-RE motif sites in each enhancer. Y-axis shows percentage of enhancers analyzed. Red: AP  
1023 enhancers, Gray: non-AP enhancers. All confidence intervals were calculated using an  
1024 appropriate bootstrap method. AP: archipelago, RE: relative entropy, BS: binding site, TF:  
1025 transcription factor. **(E)** Acetylation levels in enriched vs. depleted enhancers. Juxtaposed  
1026 views of H3K27Ac ChIP-Seq in HUVEC are shown for 40 (100) AP enhancers in the top row that  
1027 are in an AP that is active and in the top 10% for enrichment (depletion). Shown in the bottom  
1028 row are views for matched non-AP enhancers.

1029  
1030  
1031  
1032



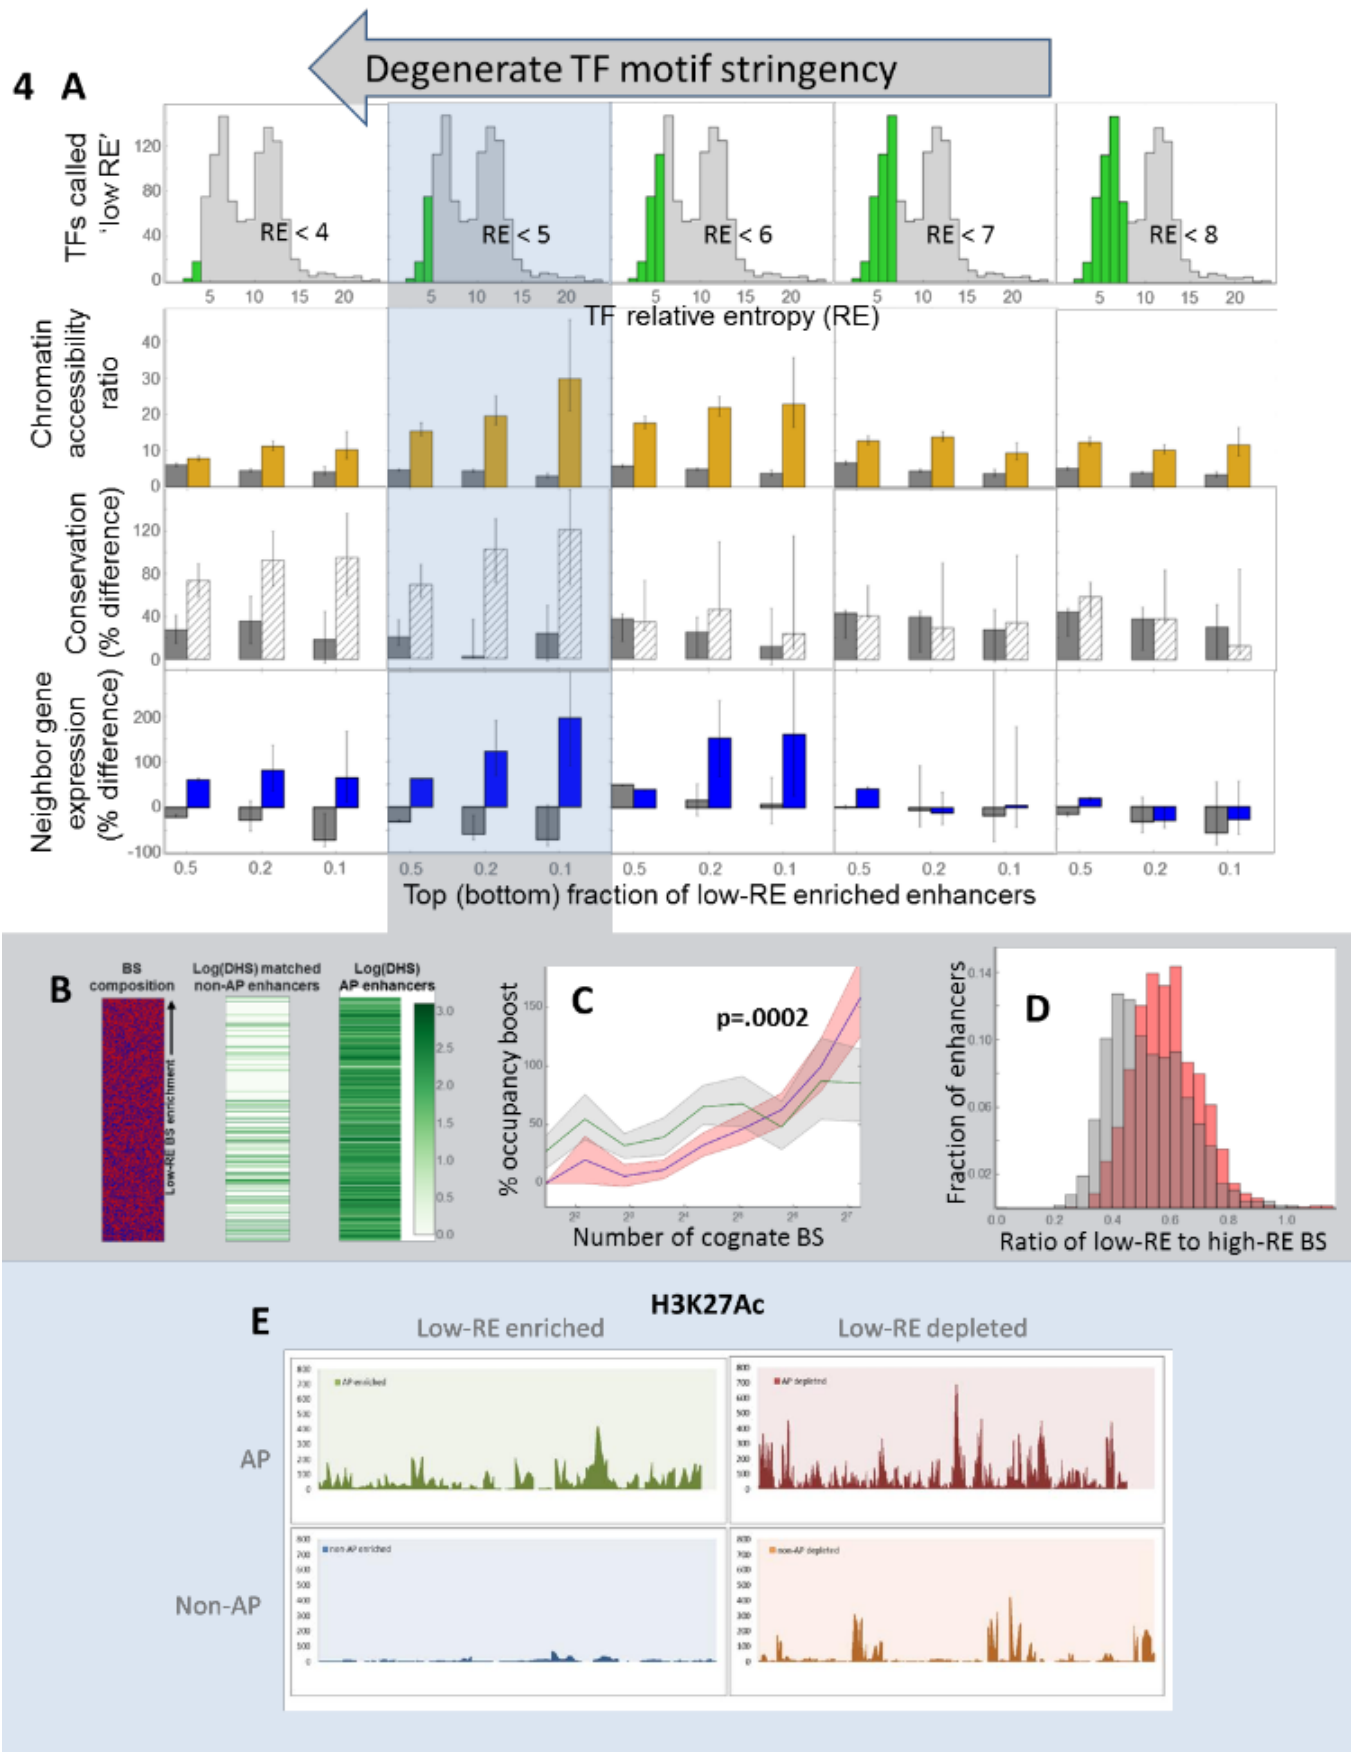

1034 **Figure 5. Mean AP accessibility scales with context-specific availability of TFs with**  
1035 **degenerate motifs and not the TFs with specific motifs.**

1036 **(A)** Occupancy boost in cell types with reduced AP activity. Occupancy was computed as a  
1037 function of coverage in 'inactive' cell types – those in which fewer than 40% of the AP's  
1038 enhancers were DNase hypersensitive (bottom). For comparison, the plot for active cell types  
1039 from 2A is reproduced (top) **(B)** Tissue specificity of occupancy for TF-AP and matched non-TF-  
1040 AP pairs as a function of TF-AP coverage. Dynamic range (y-axis) for occupancy was calculated  
1041 for each TF-AP pair as the percentage difference between mean occupancy in the AP's most  
1042 active and inactive cell types. Identical BS in active and inactive cell types were tested. Serving  
1043 as a control, dynamic range was also computed for non-TF-APs that were matched to TF-APs. A  
1044 TF-AP was required to have non-zero occupancy in both inactive and active cell types. Only TF-  
1045 APs shared in AP and non-AP contexts were used for analysis. Shown are results for TF-APs and  
1046 for non-TF-APs each sorted into 4 bins with exponentially increasing coverage cutoffs. Red: AP,  
1047 Gray: non-AP. 90% and 99% confidence intervals are shown with variable hue. AP-wide DHS as  
1048 a function of context-specific TF availability. (See also Supplemental Fig. S5) **(C)** For each TF-  
1049 AP, tissue specific DHS was compared across each of 15 tissues for which there was RNA-Seq  
1050 data available. (TF, AP, tissue) triplets were segregated into lowest-20%-coverage (cyan) and  
1051 highest-20%-coverage (red) classes based on TF-AP, and then further subdivided into low and  
1052 high expression based on tissue-specific TF expression. Bar height indicates the percentage  
1053 increase in DHS level associated with an increase in TF expression from bottom <x> to top <x>  
1054 percentage levels, where <x> is read off the x-axis. **(D)** same as (C) except matched non-AP  
1055 triplets were used. **(E)** Model of crowdsourcing effect. **(a)** The yellow highlighted region  
1056 represents a regulatory archipelago (AP) consisting of genes and distal enhancers. Within an AP,  
1057 spatially proximal binding sites (BS) for a common TF 'crowdsource' an increase in their own  
1058 occupancy. Facilitated by increased TF diffusion among large numbers of spatially proximal BS,  
1059 a spatial homotypic BS cluster favorably alters TF protein concentration in its  
1060 microenvironment. Predictably, TFs with degenerate motifs, and hence pervasive BS, exhibit the  
1061 highest occupancy boosts. **(b)** In turn, AP enhancers enriched in degenerate motifs experience  
1062 switch-like multi-fold boosts in accessibility and target gene expression. Overall, a context-  
1063 specific increase in availability of TFs with degenerate motifs – but not high-specificity motifs –  
1064 drives a multi-fold boost in chromatin accessibility, thereby underscoring crowdsourcing's likely  
1065 role in AP activation. **(c)** In contrast, a non-AP enhancer does not experience an occupancy  
1066 boost and activation. The crowdsourcing mechanism integrates well with the two prevailing  
1067 models of context-specific gene module activation: in a targeted tissue, higher expression of TFs

1068 with a degenerate motif may **(d)** induce chromatin loop formation; or alternatively **(e)** facilitate  
 1069 release of paused polymerase in pre-formed enhancer-promoter loops. In both cases,  
 1070 crowdsourcing ensures a high degree of context-specificity, mitigating spurious occupancy  
 1071 outside of or AP-active tissue or AP enhancers enriched for degenerate motifs.

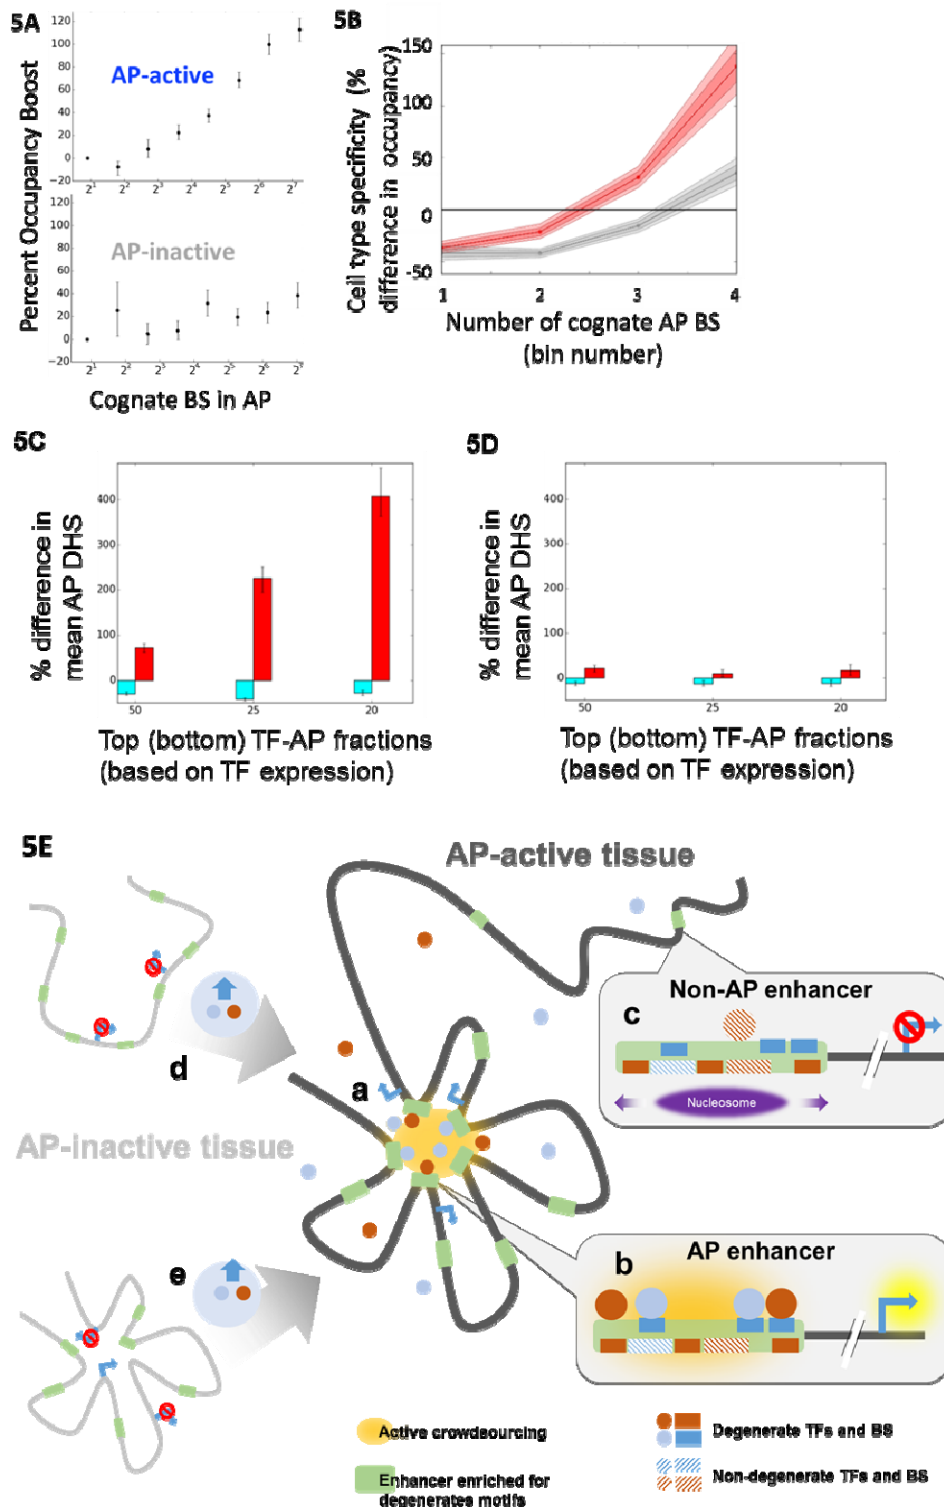

1072
